1 Neural encoding of task-dependent errors during adaptive learning

2

3 Chang-Hao Kao<sup>1</sup>, Sangil Lee<sup>1</sup>, Joshua I. Gold<sup>2</sup>, Joseph W. Kable<sup>1</sup>

4

5

6 <sup>1</sup>Department of Psychology, University of Pennsylvania, Philadelphia, PA 19104, USA

7 <sup>2</sup>Department of Neuroscience, University of Pennsylvania, Philadelphia, PA 19104, USA

8

9 Corresponding authors:

10 Chang-Hao Kao: [chakao@sas.upenn.edu](mailto:chakao@sas.upenn.edu)

11 Joseph W. Kable: [kable@psych.upenn.edu](mailto:kable@psych.upenn.edu)

12

13 **Abstract**

14 Effective learning requires using errors in a task-dependent manner, for example adjusting to  
15 errors that result from unpredicted environmental changes but ignoring errors that result from  
16 environmental stochasticity. Where and how the brain represents errors in a task-dependent  
17 manner and uses them to guide behavior are not well understood. We imaged the brains of  
18 human participants performing a predictive-inference task with two conditions that had different  
19 sources of errors. Their performance was sensitive to this difference, including more choice  
20 switches after fundamental changes versus stochastic fluctuations in reward contingencies. Using  
21 multi-voxel pattern classification, we identified task-dependent representations of error  
22 magnitude and past errors in posterior parietal cortex. These representations were distinct from  
23 representations of the resulting behavioral adjustments in dorsomedial frontal, anterior cingulate,  
24 and orbitofrontal cortex. The results provide new insights into how the human brain represents  
25 errors in a task-dependent manner and guides subsequent adaptive behavior.

26

## 27 **Introduction**

28           Errors often drive adaptive adjustments in beliefs that inform behaviors that maximize  
29 positive outcomes and minimize negative ones (Sutton & Barto, 1998). A major challenge to  
30 error-driven learning in uncertain and dynamic environments is that errors can arise from  
31 different sources that have different implications for learning. For example, a bad experience at a  
32 restaurant that recently hired a new chef might lead you to update your belief about the quality of  
33 the restaurant, whereas a similar experience at a well-known restaurant with a chef that has long  
34 been your favorite might be written off as a one-time bad night. That is, the same errors should  
35 be interpreted differently in different contexts. In general, errors that represent fundamental  
36 changes in the environment or that occur during periods of uncertainty should probably lead you  
37 to update your beliefs and change your behavior, whereas those that result from environmental  
38 stochasticity are likely better ignored (d'Acremont & Bossaerts, 2016; Li, Nassar, Kable, & Gold,  
39 2019; Nassar, Bruckner, & Frank, 2019; O'Reilly et al., 2013).

40           Neural representations of key features of these kinds of dynamic, error-driven learning  
41 processes have been identified in several brain regions. For example, several studies focused on  
42 variables derived from normative models that describe the degree to which individuals should  
43 dynamically adjust their beliefs in response to error feedback under different task conditions,  
44 including the probability that a fundamental change in the environment just occurred (change-  
45 point probability, or CPP, which is a form of surprise) and the reducible uncertainty associated  
46 with estimates of environmental features (relative uncertainty, or RU). Correlates of these  
47 variables have been identified in dorsomedial frontal (DMFC) and dorsolateral prefrontal  
48 (DLPFC) cortex and medial and lateral posterior parietal cortex (PPC) (Behrens, Woolrich,  
49 Walton, & Rushworth, 2007; McGuire, Nassar, Gold, & Kable, 2014; Nassar, McGuire, Ritz, &  
50 Kable, 2019). These and other studies also suggest specific roles for these different brain regions  
51 in error-driving learning, including representations of surprise induced by either state changes or  
52 outliers (irrelevant to state changes) in the PPC that suggest a role in error monitoring (Nassar,  
53 Bruckner, et al., 2019; O'Reilly et al., 2013), and representations of variables more closely  
54 related to belief and behavior updating in the prefrontal cortex (PFC) (McGuire et al., 2014;  
55 O'Reilly et al., 2013). However, these previous studies, which typically used continuous rather  
56 than discrete feedback, were not designed to identify neural signals related to a key aspect of

57 flexible learning in uncertain and dynamic environments: responding to the same kinds of errors  
58 differently in different conditions.

59 To identify such task-dependent neural responses to errors, we adapted a paradigm from  
60 our previous single-unit recording study (Li et al., 2019). In this paradigm, we generated two  
61 different dynamic environments by varying the amount of noise and the frequency that change-  
62 points occur (i.e., hazard rate; Behrens et al., 2007; Glaze, Kable, & Gold, 2015; Nassar et al.,  
63 2012; Nassar, Wilson, Heasley, & Gold, 2010). In one environment, noise was absent and the  
64 hazard rate was high, and thus errors unambiguously signaled a change in state. We refer to this  
65 high hazard/low noise condition as the *unstable* environment, because most errors can be  
66 attributed to volatility. In another environment, noise was high and the hazard rate was low, and  
67 thus small errors were ambiguous and could indicate either a change in state or noise. We refer to  
68 this low hazard/high noise condition as the *noisy* environment, because most errors can be  
69 attributed to stochasticity. Thus, effective learning requires treating errors in the two conditions  
70 differently, including adjusting immediately to errors in the unstable environment but using the  
71 size of errors and recent error history as cues to aid interpretation of ambiguous errors in the  
72 noisy environment.

73 In our previous study, we found many single neurons in the anterior cingulate cortex  
74 (ACC) or posterior cingulate cortex (PCC) that responded to errors or the current condition, but  
75 we found little evidence that single neurons in these regions combined this information in a task-  
76 dependent manner to discriminate the source of errors or drive behavior. In the current study, we  
77 used whole-brain fMRI and multi-voxel pattern classification to identify task-dependent neural  
78 responses to errors and activity predictive of behavioral updating in the human brain. The results  
79 show task-dependent encoding of error magnitude and past errors in PPC and encoding of  
80 behavioral shifts in frontal regions including ACC, DMFC, DLPFC and orbitofrontal cortex  
81 (OFC), which provide new insights into the distinct roles these brain regions play in representing  
82 errors in a task-dependent manner and using errors to guide adaptive behavior.

83

## 84 **Results**

85 Sixteen human participants performed a predictive-inference task (Figure 1A) while  
86 fMRI was used to measure their blood-oxygenation-level-dependent (BOLD) brain activity. The  
87 task required them to predict the location of a single rewarded target from a circular array of ten

88 targets. The location of the rewarded target was sampled from a distribution based on the  
89 location of the current best target and the noise level in the current condition. In addition, the  
90 location of the best target could change according to a particular, fixed hazard rate ( $H$ ). Two  
91 conditions with different noise levels and hazard rates were conducted in separate runs. In the  
92 noisy condition (Figure 1B–C), the rewarded target would appear in one of the five locations  
93 relative to the location of the current best target, and the hazard rate was low ( $H = 0.02$ ). In the  
94 unstable condition (Figure 1D–E), the rewarded target always appeared at the location of the best  
95 target, and the hazard rate was high ( $H = 0.35$ ). On each trial, participants made a prediction by  
96 looking at a particular target, and then were given explicit, visual feedback about their chosen  
97 target and the rewarded target. Effective performance required them to use this feedback in a  
98 flexible and task-dependent manner, including typically ignoring small errors in the noisy  
99 condition but responding to small errors in the unstable condition by updating their beliefs about  
100 the best-target location.

101

## 102 *Behavior*

103 Nearly all of the participants' choice patterns were consistent with a flexible, task-  
104 dependent learning process (closed symbols in Figure 2). On average, they learned the location  
105 of the best target after a change in its location more quickly and reliably in the unstable than the  
106 noisy condition (Figure 2A). This flexible learning process had two key signatures. First, target  
107 switches (i.e., predicting a different target than on the previous trial) tended to follow errors of  
108 any magnitude in the unstable condition but only errors of high magnitude (i.e., when the chosen  
109 target was 3, 4, or 5 targets away from the rewarded target) in the noisy condition (sign test for  
110  $H_0$ : equal probability of switching for the two conditions; error magnitude of 1: median = -0.35,  
111 interquartile range (IQR) = [-0.62, -0.25],  $p < 0.001$ ; error magnitude of 2: median = -0.30, IQR =  
112 [-0.70, -0.11],  $p < 0.001$ ; Figure 2B–C). Second, target switches depended on error history only  
113 for low-magnitude errors (i.e., when the chosen target was 1 or 2 targets away from the rewarded  
114 target) in the noisy condition but not otherwise (sign test for  $H_0$ : switching was unaffected when  
115 recent history contained fewer errors; error magnitude of 1: median = -0.29, IQR = [-0.42, -0.10],  
116  $p = 0.004$ ; error magnitude of 2: median = -0.25, IQR = [-0.38, -0.14],  $p < 0.001$ ; Figure 2D–F).

117 We accounted for these behavioral patterns with a reduced Bayesian model that is similar  
118 to ones we have used previously to model belief updating in a dynamic environment (open

119 symbols in Figure 2; Tables 1 and 2). This model provides a framework to interpret and use  
120 errors differently according to the current task conditions, as defined by hazard rate and noise  
121 level. The decision-maker's trial-by-trial updates are governed by ongoing estimates of the  
122 probability that the best target changed (change-point probability, or CPP) and reducible  
123 uncertainty about the best target's location (relative uncertainty, or RU). Both quantities are  
124 influenced by the two free parameters in the model, subjective estimates of the task hazard rate  
125 and noise level, which were fitted separately in each condition for each participant. As expected,  
126 the fitted hazard rates were higher in the unstable condition than in the noisy condition, although  
127 both tended to be higher than the objective values, as we have observed previously (Nassar et al.,  
128 2010). However, the fitted noise estimates were not reliably different between the noisy and  
129 unstable conditions (Table 2). As we observed in our previous study (Li et al., 2019), the  
130 subjective estimates of noise level were high in the unstable condition despite the objective  
131 absence of noise.

132 We also tested several alternative models but they did not provide as parsimonious  
133 descriptions of the data (Figure 2 – figure supplement 2, and Tables 1 and 2). Notably, an  
134 alternative model that assumed a condition-specific fixed learning rate also assumed errors were  
135 treated differently in the two conditions but did not include trial-by-trial adjustments of learning  
136 rates used by the reduced Bayesian model. Although this model performed better than the  
137 reduced Bayesian model in the unstable condition, it cannot capture participants' behaviors in the  
138 noisy condition, where dynamically integrating both current and past errors is required for  
139 adapting trial-by-trial behavior. Other hybrid models performed worse than the reduced Bayesian  
140 model in both conditions.

141

#### 142 *Neural representation of CPP and RU*

143 The two key internal quantities in the reduced Bayesian model are CPP and RU, both of  
144 which contribute to processing errors in a task-dependent manner (Figure 2 – figure supplement  
145 3). CPP increases as the current error magnitude increases and achieves large values more  
146 quickly in the unstable condition because of the higher hazard rate. These dynamics lead to a  
147 greater probability of switching targets after smaller errors in the unstable condition. RU  
148 increases on the next trial after the participant makes an error and does so more strongly in the  
149 noisy condition because of the lower hazard rate. These dynamics lead to a greater probability of

150 target switches when the last trial was an error, which is most prominent for small errors in the  
151 noisy condition. Thus, CPP and RU each account for one of the two key signatures of task-  
152 dependent learning that we identified in participants' behavior, with CPP driving a task-  
153 dependent influence of error magnitude and RU driving a task-dependent influence of error  
154 history on target switches.

155         Though not the main focus of this study, we were able to replicate our previous findings  
156 regarding the neural representations of CPP and RU (McGuire et al., 2014). Similar to our  
157 previous study, we found activity that was positively correlated with the levels of CPP and RU  
158 across DLPFC and PPC (Figure 2 – figure supplement 3 and 4). The regions of DLPFC and PPC  
159 that were responsive to both CPP and RU were a subset of those identified as showing this  
160 conjunction in our previous study. Because CPP and RU both contribute to responding to errors  
161 in a task-dependent manner, the brain regions that responded to both variables are good  
162 candidates for encoding errors in a task-dependent manner. In the following analyses, we aimed  
163 to directly identify task-dependent neural representations of error magnitude and error history, as  
164 well as activity that predicts subsequent shifts in behavior.

165

#### 166 *Task-dependent neural representation of errors*

167         We used multi-voxel pattern analysis (MVPA) to identify error-related neural signals that  
168 were similar and different for the two task conditions. Given the two key signatures of flexible  
169 learning that we identified in behavior, we were especially interested in identifying neural  
170 representations of error magnitude and past errors that were stronger in the noisy than the  
171 unstable condition.

172         We found robust, task-dependent representations of the magnitude of the error on the  
173 current trial in PPC. Consistent with the task-dependent behavioral effects, this representation of  
174 error magnitude was stronger in the noisy than the unstable condition (Figure 3 and Table 3).  
175 Specifically, we could classify correct versus error feedback on the current trial across almost the  
176 entire cortex, in both the unstable and noisy conditions. However, for error trials, we could  
177 classify error magnitude (in three bins: 1, 2, 3+ targets away from the rewarded target) only for  
178 the noisy condition and most strongly in the lateral and medial parietal cortex and in the occipital  
179 pole. In a parallel set of analyses, we found that univariate activity in PPC also varied in a task-

180 dependent way, responding more strongly to error magnitude in the noisy than the unstable  
181 condition (Figure 3 – figure supplement 1).

182 We also found robust, task-dependent representations of past errors in PPC. These  
183 representations also were stronger in the noisy than the unstable condition, particularly on trials  
184 for which past errors had the strongest influence on behavior. Specifically, we could classify  
185 correct versus error on the previous trial in PPC for both task conditions (Figure 4). This  
186 classification of past errors depended on the outcome of the current trial. We separated trials  
187 according to whether the current feedback was correct or an error, or whether the error  
188 magnitude provided ambiguous (error magnitudes of 1 or 2) or unambiguous (error magnitudes  
189 of 0 or 3+) feedback in the noisy condition (Figure 4). We found reliable classifications of past  
190 errors in the lateral and medial parietal cortex in both conditions for correct trials and trials with  
191 error magnitudes of 0 or 3+. Moreover, these representations depended on the current condition,  
192 and, consistent with behavioral effects of error history, were stronger for error trials and trials  
193 with error magnitudes of 1 or 2 in the noisy than in the unstable condition (Table 3). These task-  
194 dependent signals for past errors were not clearly present in univariate activity (Figure 4 – figure  
195 supplement 1). An additional conjunction analysis across MVPA results showed that PPC  
196 uniquely encoded task-dependent error signals for both error magnitude of the current trials and  
197 past errors when the current trial's error magnitude was 1 or 2 (Table 3).

198

### 199 *Neural prediction of subsequent changes in behavior*

200 Although PPC responds to errors in a task-dependent manner that could be used for  
201 determining behavioral updates, we did not find that activity in this region was predictive of the  
202 participants' future behavior. Instead, we found such predictive activity more anteriorly in the  
203 frontal lobe. Specifically, we investigated whether multi-voxel neural patterns could predict  
204 participants' target switches on the subsequent trial. We focused on the trials with small error  
205 magnitudes (1 or 2) in the noisy condition, because these were the only trial types that  
206 participants consistently exhibited an intermediate probability of switching (20–80%, Figure 2).  
207 We found that activity patterns in large cluster encompassing motor cortex, OFC, ACC, DMFC,  
208 and DLPFC could predict subsequent stay/switch decisions (Figure 5, Table 4). We also  
209 evaluated this result with different approaches to cluster formation that were more or less



210 spatially specific (Figure 5 – figure supplement 1). We did not find any regions where univariate  
211 activity reliably predicted participants’ subsequent behavior (Figure 5 – figure supplement 2).

212

## 213 **Discussion**

214 We identified task-dependent neural representations of errors in humans performing  
215 dynamic learning tasks. Participants were required to learn in two different dynamic  
216 environments. In the unstable condition (high hazard rate and low noise), errors unambiguously  
217 indicated a change in the state of the environment, and participants reliably updated their  
218 behavior in response to errors. In contrast, in the noisy condition (low hazard rate and high noise),  
219 small errors were ambiguous, and participants used both the current error magnitude and recent  
220 error history to distinguish between those errors that likely signal change-points and those likely  
221 arising from environmental noise. Using MVPA, we showed complementary roles of PPC and  
222 prefrontal regions (including motor cortex, OFC, ACC, DMFC and DLPFC) in the outcome-  
223 monitoring and action-selection processes underlying these flexible, task-dependent behavioral  
224 responses to errors. Neural patterns in PPC encoded the magnitude of errors and past errors,  
225 more strongly in the noisy than the unstable condition. These task-dependent neural responses to  
226 errors in PPC were not reliably linked to subsequent changes in behavior. In contrast, neural  
227 patterns in prefrontal regions could predict subsequent changes in behavior (whether participants  
228 switch their choice on the next trial or not) in response to ambiguous errors in the noisy  
229 condition.

230

### 231 *Task-dependent behavior adaptation*

232 Consistent with previous studies of ours and others (d’Acromont & Bossaerts, 2016;  
233 McGuire et al., 2014; Nassar, Bruckner, et al., 2019; Nassar et al., 2012; Nassar et al., 2010;  
234 O’Reilly et al., 2013; Purcell & Kiani, 2016), human participants adapted their response to errors  
235 differently in different environments. In the unstable condition, participants almost always  
236 switched their choice after errors and quickly learned the new state after change-points. In  
237 contrast, in the noisy condition, participants ignored many errors and only slowly learned the  
238 new state after change-points. In this condition, participants had to distinguish true change-points  
239 from environmental noise, and they used error magnitude and recent error history as a cue for  
240 whether the state had recently changed or not. These flexible and task-dependent responses to

241 errors could be accounted for by a reduced Bayesian model (McGuire et al., 2014; Nassar et al.,  
242 2012; Nassar et al., 2010). This model assumes that participants use approximately optimal  
243 inference processes but can have subjective estimates of environmental parameters (hazard rate,  
244 noise) that depart from their true values.

245

#### 246 *Neural representation of change-point probability and relative uncertainty*

247 In the reduced Bayesian model, beliefs and behavior are updated dynamically according  
248 to two key internal quantities, CPP and RU. Replicating our previous work (McGuire et al.,  
249 2014), we identified neural activity correlated with both CPP and RU in PPC and DLPFC. This  
250 replication shows the robustness of these neural representations of CPP and RU across  
251 experimental designs that differ dramatically in their visual stimuli and motor demands, yet share  
252 the need to learn in dynamic environments with similar statistics. We extended those findings to  
253 show that some brain regions that encode both CPP, which in the model accounts for task-  
254 dependent behavioral responses to error magnitude, and RU, which in the model accounts for  
255 task-dependent behavioral responses to recent error history, also encode errors in a task-  
256 dependent manner or predict subsequent behavioral updates.

257

#### 258 *Task-dependent neural representation of errors*

259 Advancing beyond previous work, we identified task-dependent encoding of errors in  
260 neural activity in the PPC. Mirroring the task dependence of behavior, the multivariate neural  
261 pattern in PPC encoded current error magnitude more strongly in the noisy condition than in the  
262 unstable condition and encoded past errors more strongly on trials that provided ambiguous  
263 feedback in the noisy condition. These same regions of PPC have been shown previously to  
264 represent errors, error magnitudes, surprise and salience (Fischer & Ullsperger, 2013; Gläscher,  
265 Daw, Dayan, & O'Doherty, 2010; McGuire et al., 2014; Nassar, Bruckner, et al., 2019; Nassar,  
266 McGuire, et al., 2019; O'Reilly et al., 2013; Payzan-LeNestour, Dunne, Bossaerts, & O'Doherty,  
267 2013). In addition, these regions have been shown to integrate recent outcome or stimulus history  
268 in human fMRI studies (FitzGerald, Moran, Friston, & Dolan, 2015; Furl & Averbach, 2011) and  
269 in animal single neuron recording studies (Akrami, Kopec, Diamond, & Brody, 2018; Brody &  
270 Hanks, 2016; Hanks et al., 2015; Hayden, Nair, McCoy, & Platt, 2008; Hwang, Dahlen,  
271 Mukundan, & Komiyama, 2017). Our results extend on these past findings by demonstrating that

272 the neural encoding of error magnitude and error history in PPC is modulated across different  
273 conditions in precisely the manner that could drive adaptive behavior.

274 These whole-brain fMRI results complement our previous results recording from single  
275 neurons in ACC and PCC in the same task (Li et al., 2019). In that study, we identified single  
276 neurons in both ACC and PCC that encoded information relevant to interpreting errors, such as  
277 the magnitude of the error or the current condition. However, we did not find any neurons that  
278 combined this information in a manner that could drive adaptive behavioral adjustments. Our  
279 whole-brain fMRI results suggest that PPC would be a good place to look for task-dependent  
280 error representations in single neurons, including a region of medial parietal cortex slightly  
281 dorsal to the PCC area we recorded from previously.

282

### 283 *Neural representations of task-dependent behavioral updating*

284 Also advancing beyond previous work, we identified neural activity predictive of  
285 behavioral updates across the frontal cortex, including DLPFC. In the noisy condition, small  
286 errors provided ambiguous feedback that could reflect either a change in state or environmental  
287 noise. Accordingly, after small errors in the noisy condition, participants exhibited variability  
288 across trials in whether they switched from their current choice on the subsequent trial or not. In  
289 these ambiguous situations, the multivariate neural pattern in large cluster in frontal cortex,  
290 including motor cortex, OFC, ACC, DMFC and DLPFC, predicted whether people switched or  
291 stayed on the subsequent trial. These results extend previous findings that the multivariate  
292 pattern in frontal cortex, particularly ACC and medial PFC, can decode subsequent switching  
293 versus staying in a reversal learning task (Hampton & O'Doherty, 2007). These results suggest a  
294 dissociation between PPC regions that monitor error information in a task-dependent manner and  
295 frontal regions that may use this information to update beliefs and select subsequent actions.

296 This ability to decode subsequent choices might arise from different kinds of  
297 representations in different areas of frontal cortex. Whereas motor and premotor regions may  
298 reflect the change in action plans, other frontal regions might reflect changes in abstract  
299 representations of belief states. Medial PFC is involved in performance monitoring,  
300 distinguishing errors from different sources such as actions and feedback (Ullsperger,  
301 Danielmeier, & Jocham, 2014), registering a hierarchy of prediction errors from those due to  
302 environmental noise to those due to a change in the environmental state (Alexander & Brown,

2015), and interacting with lateral PFC to guide subsequent behavioral adjustments in response to errors (Alexander & Brown, 2015). Consistent with this role, activity in DMFC also reflects the extent of belief updating in dynamic environments (Behrens et al., 2007; Hampton, Bossaerts, & O’Doherty, 2006; McGuire et al., 2014; O’Reilly et al., 2013). OFC and DMFC encode the identity of the current latent state in a mental model of the task environment and neural representations in these regions changes as the state changes (Chan, Niv, & Norman, 2016; Hunt et al., 2018; Karlsson, Tervo, & Karpova, 2012; Nassar, McGuire, et al., 2019; Schuck, Cai, Wilson, & Niv, 2016; Wilson, Takahashi, Schoenbaum, & Niv, 2014). Activity in inferior frontal junction reflects the updating of task representations (Brass & Cramon, 2004; Derrfuss, Brass, Neumann, & von Cramon, 2005). Neural activity in frontopolar cortex (Daw, O’Doherty, Dayan, Seymour, & Dolan, 2006) and DMFC (Blanchard & Gershman, 2018; Kolling, Behrens, Mars, & Rushworth, 2012; Kolling et al., 2016; Muller, Mars, Behrens, & O’Reilly, 2019) increases during exploratory choices, which occur more frequently during periods of uncertainty about the most beneficial option. In a recent study, we identified distinct representations of latent states, uncertainty, and behavioral policy in distinct areas of frontal cortex during learning in a dynamic environment (Nassar et al., 2019). Our results extend these past findings and demonstrate the role of these frontal regions in adjusting behavior in response to ambiguous errors.

320

### 321 *Caveats*

322 A few caveats should be considered when interpreting our results. First, we had relatively  
323 small number of participants in this study (n=16). Although we control the false positive rates  
324 through permutation tests that have been validated empirically (Eklund, Nichols, & Knutsson,  
325 2016), it is possible that we lacked the statistical power to detect some effects, and so null results  
326 should be interpreted with caution. Second, in this study, we created two qualitatively different  
327 task conditions by manipulating both the noise levels and hazard rates. Thus, we cannot attribute  
328 any behavioral or neural differences across conditions specifically to changes in either noise  
329 levels or hazard rates alone, but rather to how the combinations of these two variables affect the  
330 interpretation and use of small errors. Future studies can manipulate hazard rate and noise  
331 independently to examine their independent contributions to adaptive learning.

332

### 333 *Conclusion*

334 People adapt their behavior in response to errors in a task-dependent manner,  
335 distinguishing between errors that indicate change-points in the environment versus noise. Here  
336 we used MVPA to identify two distinct kinds of neural signals contributing to these adaptive  
337 behavioral adjustments. In PPC, neural patterns encoded error information in a task-dependent  
338 manner, depending on error magnitude and past errors only under conditions where these were  
339 informative of the source of error. In contrast, activity in frontal cortex could predict subsequent  
340 choices that could be based on this information. These findings suggest a broad distinction  
341 between outcome monitoring in parietal regions and action selection in frontal regions when  
342 learning in dynamic and uncertain environments.

343

## 344 **Materials and Methods**

### 345 *Participants*

346 All procedures were approved by University of Pennsylvania Internal Review Board. We  
347 analyzed data from sixteen participants (9 females, 7 males, mean age = 23.5, SD = 4.3, range =  
348 18–33 years) recruited for the current study. One additional participant was excluded from  
349 analyses because of large head movements during MRI scanning (>10% of timepoint-to-  
350 timepoint displacements were >0.5 mm). All participants provided informed consent before the  
351 experiment. Participants received a participation fee of \$15, as well as extra incentives based on  
352 their performance (mean = \$15.09, SD = \$2.26, range = \$8.5–17.5).

353

### 354 *Task*

355 Participants performed a predictive-inference task during MRI scanning. On each trial,  
356 participants saw a noisy observation sampled from an unobserved state. The participants' goal  
357 was to predict the location of the noisy observation. To perform this task well, however, they  
358 should infer the location of the current state.

359 In this task (Li et al., 2019), there were 10 targets aligned in a circle on the screen (Figure  
360 1A). At the start of each trial, participants had to fixate a central cross for 0.5 seconds to  
361 initialize the trial. After the cross disappeared, participants could choose one of 10 targets (red)  
362 by looking at it within 1.5 seconds and keeping fixation on the chosen target for 0.3 seconds.  
363 Then, an outcome would be shown for 1 second. During the outcome phase, a green dot  
364 indicated the chosen target. A purple or cyan target indicated the rewarded target, with color

365 denoting 10 or 20 points of reward value, respectively. At the end of experiment, every 75 points  
366 were converted to \$0.25 as participants' extra incentives.

367 Participants performed this task in two dynamic conditions separated into two different  
368 runs: a high-noise/low-hazard ("noisy") condition and an low-noise/high-hazard ("unstable")  
369 condition. In the noisy condition, the rewarded target could be one of five targets, given the  
370 underlying state (Figure 1B). The rewarded target probabilities for the relative locations ( $[-2, -1,$   
371  $0, 1, 2]$ ) of the current state were  $[0.05, 0.15, 0.6, 0.15, 0.05]$ . Thus, the location of the current  
372 state was most likely rewarded, but nearby targets could also be rewarded. Occasionally, the  
373 state would change its location with a hazard rate of 0.02 (Figure 1C). When a change-point  
374 happens, the new state would be selected among the ten targets based on a uniform distribution.  
375 In the unstable condition, there was no noise (Figure 1D). That is, the location of the state would  
376 be always rewarded. However, the state was unstable, as the hazard rate in this condition was  
377 0.35 (Figure 1E). There were 300 trials in each run.

378

### 379 *Behavior analysis*

380 We investigated how participants used error feedback flexibly across different conditions.  
381 Before the behavioral analysis, we removed two different kinds of trials. First, we removed trials  
382 in which participants did not make a choice within the time limit (Unstable: median number of  
383 trials = 10.5, range = 1–83; Noisy: median = 10, range = 2–88). Second, we also removed trials  
384 in which the location of the chosen target was not on the shortest distance between the previously  
385 chosen and previously rewarded targets (Unstable: median = 3, range = 0–24; Noisy: median =  
386 17, range = 5–37). All of the belief updating models we tested predict that participants' choice  
387 should be along the shortest distance between the previously chosen target and the previously  
388 rewarded target. That is, participants should update in a clockwise direction, if the shortest  
389 distance to rewarded target was clockwise of the chosen target. Otherwise, they should update in  
390 a counterclockwise direction. We removed trials where participants' update was in the opposite  
391 direction of the rewarded target (which would correspond to a learning rate  $< 0$ ) and trials where  
392 participants' update was beyond the location of the rewarded target (which would correspond to  
393 a learning rate  $> 1$ ), as this behavior cannot be captured by any of the belief updating models we  
394 tested. Further, this behavior might suggest that participants had lost track of the most recently  
395 chosen or rewarded targets.

396 First, we investigated how fast participants learned the location of the current state. For  
397 each condition and participant, we binned trials from trial 0 to trial 20 after change-points. Then,  
398 we calculated the probability of choosing the location of the current state for each bin.

399 Second, we examined how different magnitudes of errors lead to shifts in behavior. For  
400 each condition and participant, we binned trials based on the current error magnitude (from 0 to  
401 5). Then, for each bin, we calculated the probability that participants switch their choice to  
402 another target on the subsequent trial. We hypothesized participants would have a lower  
403 probability of switching after small error magnitudes (1 or 2) in the noisy condition than in the  
404 unstable condition since such errors could be due to environment noise in the noisy condition but  
405 would signal a state change in the unstable condition.

406 Third, we further investigated how error history influenced participants' behavioral shifts.  
407 Similarly, we binned trials based on the current error magnitude and the error history of the last  
408 three trials. Here, we used four bins of error magnitudes (0, 1, 2, 3+). Based on the outcome of  
409 correct or error on the last three trials, there were 8 types of error history. For each error  
410 magnitude, we calculated the probability of switching for each type of error history. We  
411 hypothesized that participants in the noisy condition would tend to switch their choice after small  
412 errors more if they had made more errors recently. To test this hypothesis, we ordered the 8 types  
413 of error history based on the number of recent errors and calculated the slope of probability of  
414 switching against the order of error history. A negative slope means that participants tend to  
415 switch as they receive more recent errors.

416

#### 417 *Behavior modeling*

418 We fit several different computational models to participants' choices to evaluate which  
419 ones could best account for their behavior in the task.

420

#### 421 *Reduced Bayesian (RB) model*

422 Previous studies have shown that a reduced Bayesian model, which approximates the full  
423 Bayesian ideal observer, could account well for participants' behavior in dynamic environments  
424 similar to the current task (McGuire et al., 2014; Nassar et al., 2012; Nassar et al., 2010). In this  
425 model, belief is updated by a delta rule:

426

427 
$$\delta_t = x_t - B_t \quad (1)$$

428 
$$B_{t+1} = B_t + \alpha_t \delta_t \quad (2)$$

429

430 where  $B_t$  is the current belief and  $x_t$  is the current observation. The new belief ( $B_{t+1}$ ) is formed  
431 by updating the old belief according to the prediction error ( $x_t - B_t$ ) and a learning rate ( $\alpha_t$ ).  
432 The learning rate controls how much a participant revises their belief based on the prediction  
433 error. In this model, the learning rate is adjusted on a trial-by-trial basis according to:

434

435 
$$\alpha_t = \Omega_t + (1 - \Omega_t)\tau_t \quad (3)$$

436

437 where  $\Omega_t$  is the change-point probability and  $\tau_t$  is the relative uncertainty. That is,  $\alpha_t$  is high as  
438 either  $\Omega_t$  or  $\tau_t$  is high. The change-point probability is the relative likelihood that the new  
439 observation represents a change-point as opposed to a sample from the currently inferred state  
440 (Nassar et al., 2010):

441

442 
$$\Omega_t = \frac{U(x_t|1, 10)^H}{U(x_t|1, 10)^H + f_p(x_t|\gamma_t, B_t)^{(1-H)}} \quad (4)$$

443

444 where  $H$  is the hazard rate,  $U(x_t|1, 10)$  is the probability of outcome derived from a uniform  
445 distribution, and  $f_p(x_t|\gamma_t, B_t)$  is the probability of outcome derived from the current predictive  
446 distribution. That is,  $U(x_t|1, 10)$  reflects the probability of outcome when a change-point has  
447 occurred while  $f_p(x_t|\gamma_t, B_t)$  reflects the probability of outcome when the state has not changed.  
448 The predictive distribution is an integration of the state distribution and the noise distribution:

449

450 
$$f_p(X|\gamma_t, B_t) = C \times P(X|B_t)^{\gamma_t} \times P(X|B_t) \quad (5)$$

451

452 where  $X$  is a random variable determining the locations of target,  $P(X|B_t)$  is the noise  
453 distribution in the current condition,  $P(X|B_t)^{\gamma_t}$  is the state distribution,  $\gamma_t$  is the expected run  
454 length after the change-point, and  $C$  is a normalizing constant to make the sum of probabilities in  
455 the predictive distribution equal one. Thus, the uncertainty of this predictive distribution comes  
456 from two sources: the uncertainty of the state distribution ( $\sigma_s^2$ ) and the uncertainty of the noise



457 distribution ( $\sigma_N^2$ ). The uncertainty of the state distribution would decrease as the expected run  
458 length increases.

459 The expected run length reflects the expected number of trials that a state remains stable,  
460 and thus is updated on each trial based on the change-point probability (Nassar et al., 2010):

461  
462 
$$\gamma_{t+1} = (\gamma_t + 1)(1 - \Omega_t) + \Omega_t \quad (6)$$

463  
464 where the expected run length is a weighted average conditional on the change-point probability.  
465 If no change-point occurs (i.e., change-point probability is low), the expected run length would  
466 increase, leading the uncertainty of the state distribution to decrease. That is, as more  
467 observations from the current state are received, participants are more certain about the location  
468 of the current state. However, if the change-point probability is high, which signals a likely  
469 change in the state, the expected run length would be reset to 1. Thus, the uncertainty of the state  
470 distribution becomes large. Participants are more uncertain about the current state after a change-  
471 point.

472 The other factor influencing the learning rate is the relative uncertainty, which is the  
473 uncertainty regarding the current state relative to the irreducible uncertainty or noise (McGuire et  
474 al., 2014; Nassar et al., 2012):

475  
476 
$$\tau_{t+1} = \frac{\Omega_t \sigma_N^2 + (1 - \Omega_t) \sigma_S^2 + \Omega_t (1 - \Omega_t) [\delta_t (1 - \tau_t)]^2}{\Omega_t \sigma_N^2 + (1 - \Omega_t) \sigma_S^2 + \Omega_t (1 - \Omega_t) [\delta_t (1 - \tau_t)]^2 + \sigma_N^2} \quad (7)$$

477  
478 The three terms in the numerator contribute to the uncertainty about the current state. The  
479 first term reflects the uncertainty conditional on the change-point distribution; the second term  
480 reflects the uncertainty conditional on the non-change-point distribution; and the third term  
481 reflects the uncertainty due to the difference between the two distributions. The denominator  
482 shows the total variance which is the summation of the uncertainty about the current state and the  
483 noise. As more precise observations are received in a given state, this relative uncertainty would  
484 decrease.

485 To fit the reduced Bayesian model to behavior, we assumed that participants can depart  
486 from the ideal observer by having subjective estimates of the key environmental variables,  
487 hazard rate and noise, that may differ from the true value of these variables. During model fitting,

488 the subjective noise distribution was estimated with the von Mises distribution, which is a  
489 circular Gaussian distribution:

490

$$491 \quad P(x_t | B_t, K) = \frac{e^{K \cos(x_t - B_t)}}{\sum_{i=1}^{10} e^{K \cos(x_i - B_t)}} \quad (8)$$

492

493 where  $B_t$  is the location of the current belief,  $x_i$  is the location of target, and  $K$  controls the  
494 uncertainty of this distribution. When  $K$  is 0, this is a uniform distribution. As  $K$  increases, the  
495 uncertainty decreases. The denominator is used as a normalization term to make sure the sum of  
496 all the probabilities equals one. Thus, there are two free parameters in this model: hazard rate ( $H$ ,  
497 in Eq. 4) and noise level ( $K$ , in Eq. 8). The range of hazard rate is between 0 and 1 and the noise  
498 level is greater than or equal to zero.

499

#### 500 Fixed learning rate (fixedLR) model

501 We also consider an alternative model in which participants used a fixed learning rate in  
502 each of the two dynamic conditions. That is, the learning rate is the same over all trials in a  
503 condition. This model has one free parameter, the fixed learning rate ( $\alpha_{fixed}$ ), for each condition  
504 (Eq. 2). The fixed learning rate is between 0 and 1.

505

#### 506 Hybrid of RB model and fixedLR model

507 Furthermore, we consider a hybrid model, in which the learning rate on each trial is a  
508 mixture of the learning rates from the RB model and the fixedLR model:

509

$$510 \quad \alpha_t = w\alpha_{RB} + (1 - w)\alpha_{fixed} \quad (9)$$

511

512 where  $\alpha_{RB}$  is the learning rate from the RB model and is varied trial by trial according to  $\Omega_t$  and  
513  $\tau_t$ ,  $\alpha_{fixed}$  is the learning rate from the fixedLR model and  $w$  reflects the weight to integrate these  
514 two learning rates. In this model, there are four free parameters: hazard rate, noise level, fixed  
515 learning rate and weight. The weight is between 0 and 1.

516

#### 517 Hybrid of RB model and $P_{stay}$

518 Finally, we consider a hybrid model, which combines the RB model with a fixed  
519 tendency to stay on the current target regardless of the current observation. Such a fixed  
520 tendency to stay was observed in monkeys in our previous study (Li et al., 2019). Here the belief  
521 is updated by:

$$522 \quad B_{t+1} = B_t + [(1 - P_{stay}) \times \alpha_t (X_t - B_t) + P_{stay} \times 0] \quad (10)$$

524  
525 where  $P_{stay}$  is the probability that participants stay on the current target. This model has three  
526 free parameters: hazard rate, noise level and the probability of stay. The probability of stay is  
527 between 0 and 1.

### 528 529 Model fitting and comparison

530 Each model was fitted to data from each participant and within each condition separately.  
531 Optimal parameters were estimated by minimizing the mean of the squared error (MSE) between  
532 a participant's prediction and the model prediction.

$$533 \quad MSE = \frac{\sum_{t=1}^n (B_t - \widehat{B}_t)^2}{n} \quad (11)$$

534  
535 where  $t$  is the trial,  $n$  is the total number of included trials,  $B_t$  is a participant's prediction on trial  
536  $t$ , and  $\widehat{B}_t$  is the model prediction on trial  $t$ .

537  
538 Because each model used a different number of parameters and each participant had a  
539 different number of included trials, we used Bayesian Information Criterion (BIC) to compare  
540 the performance of different models:

$$541 \quad BIC = n \ln(MSE) + k \ln(n) \quad (12)$$

542  
543 where  $n$  is the number of included trials and  $k$  is the number of free parameters in a model. A  
544 model with lower BIC performs better.

545  
546  
547 *MRI Data Acquisition and Preprocessing*

548 We acquired MRI data on a 3T Siemens Prisma with a 64-channel head coil. Before the  
549 task, we acquired a T1-weighted MPRAGE structural image (0.9375 X 0.9375 X 1 mm voxels,  
550 192 X 256 matrix, 160 axial slices, TI = 1,100 ms, TR = 1,810 ms, TE = 3.45 ms, flip angle = 9°).  
551 During each run of the task, we acquired functional data using a multiband gradient echo-planar  
552 imaging (EPI) sequence (1.9592 X 1.9592 X 2 mm voxels, 98 X 98 matrix, 72 axial slices tilted  
553 30° from the AC-PC plane, TR = 1,500 ms, TE = 30 ms, flip angle = 45°, multiband factor = 4).  
554 The scanning time (mean = 24.14 minutes, SD = 1.47, range = 21.85-30.00) for each run was  
555 dependent on the participants' pace. After the task, fieldmap images (TR = 1,270 ms, TE = 5 ms  
556 and 7.46 ms, flip angle = 60°) were acquired.

557 Data were preprocessed using FMRIB's Software Library (FSL) (Jenkinson, Beckmann,  
558 Behrens, Woolrich, & Smith, 2012; Smith et al., 2004). Functional data were motion corrected  
559 using MCFLIRT (Jenkinson, Bannister, Brady, & Smith, 2002), high-pass filtered with a  
560 Gaussian-weighted least square straight line fitting of  $\sigma = 50$  s, undistorted and warped to MNI  
561 space. To map the data to MNI space, boundary-based registration was applied to align the  
562 functional data to the structural image (Greve & Fischl, 2009) and fieldmap-based geometric  
563 undistortion was also applied. In addition, the structural image was normalized to the MNI space  
564 (FLIRT). Then, these two transformations were applied to the functional data.

565

566 *fMRI analysis: univariate activity correlated with CPP and RU*

567 Using similar procedures to our previous study (McGuire et al., 2014), we examined the  
568 effects of CPP and RU on univariate activity. Both the current study and the previous study  
569 investigate the computational process and neural mechanisms during learning in dynamic  
570 environments. The underlying task structures (which involved noisy observations and sudden  
571 change-points) are similar between the two studies, but the two studies used very different visual  
572 stimuli and motor demands. We specifically focused on the noisy condition in the current study  
573 because it was more similar to the underlying structure, in terms of noisy observations and  
574 hazard rate of change-points, to our previous study.

575 We investigated the factors of CPP, RU, reward values and residual updates. The trial-by-  
576 trial CPP and RU were either estimated from the RB model with subjective estimates of hazard  
577 rate and noise (as this was the best-fitting model in the current study, analyses presented in  
578 Figure 2 – Supplement 3) or from the RB model with true estimates of hazard rate and noise (as

579 this corresponds to how correlates of CPP and RU were identified in our previous study, analyses  
580 presented in Figure 2 – Supplement 4). The residual update reflects the difference between the  
581 participants' update and the predicted update, and is estimated from a behavioral regression  
582 model in a similar manner as our previous study:

$$583 \quad \text{Update}_t = \beta_0 + \beta_1 \delta_t + \beta_2 \delta_t \Omega_t + \beta_3 \delta_t (1 - \Omega_t) \tau_t + \beta_4 \delta_t \text{Reward} + \varepsilon \quad (13)$$

584  
585 where  $\text{Update}_t$  is the difference between  $B_{t+1}$  and  $B_t$ ,  $\delta_t$  is the error magnitude, both  $\Omega_t$  and  $\tau_t$   
586 were derived from the RB model, and the reward value indicated whether a correct response  
587 earned a large or a small value on that trial.

588  
589 Then, a general linear model using these four factors was implemented on the neural data.  
590 Here we further smoothed the preprocessed fMRI data with a 6 mm FWHM Gaussian kernel. We  
591 included several trial-by-trial regressors of interest in the GLM: onsets of outcome, CPP, RU,  
592 reward value, and residual update. Six motion parameters were also included as confounds. To  
593 control false-positive rates (Eklund et al., 2016), statistical testing was implemented through one-  
594 sample cluster-mass permutation tests with 5,000 iterations. The cluster-forming threshold was  
595 uncorrected voxel  $p < 0.01$ . Statistical testing was then based on the corrected cluster  $p$  value. For  
596 the conjunction analyses, we used the same procedure as the previous study (McGuire et al.,  
597 2014). We kept regions that passed the corrected threshold and showed the same sign of effects.  
598 For these conjunction tests, we only kept regions that have at least 10 contiguous voxels.

599 Because the number of participants was fewer in this study ( $n=16$ ) than in the previous  
600 study ( $n=32$ ), we might have lower power to detect effects in the whole-brain analyses. Thus, we  
601 also implemented ROI analyses. We selected seven ROIs that showed the conjunction effects of  
602 CPP, RU and reward value in the previous study (McGuire et al., 2014) and tested the effects of  
603 CPP and RU in these ROIs.

604 We found previously that for a similar task, the presence or absence of reward on a given  
605 trial influenced both belief-updating behavior and some aspects of its neural representation  
606 (McGuire et al., 2014). To further examine those effects, here we included two different earnable  
607 values (10 versus 20 points). However, we did not find any significant effects of earnable values  
608 on either belief updating ( $\beta_4$  in Eq. 13 was not significantly different than zero) or neural activity  
609 (for the contrast of high versus low earnable value). We therefore do not further consider the

610 effects of this manipulation in the current report. We speculate that this lack of an effect  
611 contrasts from our earlier finding because here we used high versus low earnable values, whereas  
612 in that study we used the presence versus absence of earnable value.

613

614 *fMRI analysis: multi-voxel pattern analysis (MVPA)*

615 We implemented MVPA to understand the neural representation of error signals and  
616 subsequent choices. Our analyses focus on the multi-voxel pattern when participants received an  
617 outcome. Before implementing MVPA, we estimated trial-by-trial beta values using the  
618 unsmoothed preprocessed fMRI data. We used the general linear model (GLM) to estimate the  
619 beta weights for each trial (Mumford, Turner, Ashby, & Poldrack, 2012). In each GLM, the first  
620 regressor is the trial of interest and the second combines the rest of trials in the same condition.  
621 These two regressors were then convolved with a gamma hemodynamic response function. In  
622 addition, six motion parameters were included as control regressors. We repeated this process  
623 (one GLM per trial) to estimate trial-by-trial beta values for all the trials in the two conditions.  
624 We then used these beta values as observations for MVPA. A whole-brain searchlight was  
625 implemented (Kriegeskorte, Goebel, & Bandettini, 2006). In each searchlight, a sphere with the  
626 diameter of 5 voxels (10 mm) was formed, and the pattern of activity across the voxels within the  
627 sphere were used to run MVPA.

628 A support vector machine (SVM) with a linear kernel was used to decode different error  
629 signals and choices in our whole-brain searchlight analysis. We implemented SVM through the  
630 LIBSVM toolbox (Chang & Lin, 2011). To avoid overfitting, we used 3-fold cross-validation,  
631 with one fold used as testing data and the other two as training data. Training data were used to  
632 train the classifier and then this classifier was used on testing data to examine the classification  
633 accuracy. In linear SVM, a free parameter  $c$  regularizes the trade-off between decreasing training  
634 error and increasing generalization. Thus, during the training of classifier, the training data were  
635 further split into 3-folds to select the optimal value of the parameter  $c$  through cross-validation.  
636 We pick the optimal value for  $c$  from [0.001, 0.01, 0.1, 1, 10, 100, 1000] and this optimal  
637 parameter should maximize the cross-validation accuracy. Then, we used the optimal parameter  
638  $c$  to train the model again based on the entire training data and calculated the classification  
639 accuracy on the testing data. We repeated this procedure with each of the three folds held out as  
640 testing data and calculated the average of the classification accuracy. To minimized the influence

641 of different number of trials for each category on the classification accuracy, we used balanced  
642 accuracy. For balanced accuracy, we first calculated the classification accuracy within each  
643 category, and then averaged the accuracies across all categories. The baseline balanced accuracy  
644 was also validated via permutations with 5,000 iterations. For each permutation, each trial was  
645 randomly assigned one category with a probability proportional to the number of trials in that  
646 category among all the trials. We then used the average of balanced accuracy across these  
647 iterations as the baseline accuracy. The baseline accuracy for two categories was 50% and for  
648 three categories was 33%.

649 We first examined how the multi-voxel neural pattern on the current trial could  
650 discriminate correct versus error on the current trial or error magnitudes on error trials. For the  
651 analysis of error magnitudes, we split trials into three bins of error magnitude: 1, 2, and 3+.

652 We next examined how the multi-voxel neural pattern on the current trial could  
653 discriminate whether the previous trial was an error or not. We also investigated how the  
654 classification of past errors differs conditional on the type of the current trial. We classified trial  
655  $t-1$  as correct or error separately for four different types of current trials: correct trials, error trials,  
656 trials with error magnitudes of 0 or 3+ and trials with error magnitudes of 1 or 2. We  
657 differentiated between trials with error magnitudes of 0 or 3+ and trials with error magnitudes of  
658 1 or 2 because error magnitudes of 0 or 3+ provide unambiguous evidence regarding a change of  
659 state in the noisy condition while error magnitudes of 1 or 2 provide ambiguous evidence about a  
660 change of the state in the noisy condition.

661 Lastly, we examined how the multi-voxel neural pattern on the current trial could classify  
662 the choice on the next trial. In this analysis, we focused only on the trials with error magnitudes  
663 of 1 or 2 in the noisy condition, because only under these conditions were participants similarly  
664 likely to switch versus stay. For these trials, we examined whether the multi-voxel pattern on the  
665 current trial predicted whether the participant stayed or switched on the next trial.

666 After obtaining the classification accuracy for each participant, we subtracted the baseline  
667 accuracy from the classification accuracy. Before conducting a group-level test, we smoothed  
668 these individual accuracy maps with a 6 mm FWHM Gaussian kernel. To control false-positive  
669 rates (Eklund et al., 2016), statistical testing was implemented through one-sample cluster-mass  
670 permutation tests with 5,000 iterations. We used uncorrected voxel  $p < 0.01$  to form a cluster and  
671 estimated the corrected cluster  $p$  value for each cluster. For comparison, we report our results

672 using other cluster-forming procedures in supplemental analyses. For the conjunction analyses,  
673 we used the same procedure described above.  
674



675 **Acknowledgments**

676 This work was supported by grants from National Institute of Mental Health (R01-MH098899 to  
677 J.I.G. and J.W.K.) and National Science Foundation (1533623 to J.I.G. and J.W.K.). We thank  
678 Yin Li for valuable comments; M. Kathleen Caulfield for fMRI scanning.

679

680

## References

- 681 Akrami, A., Kopec, C. D., Diamond, M. E., & Brody, C. D. (2018). Posterior parietal cortex  
682 represents sensory history and mediates its effects on behaviour. *Nature*, *554*, 368.  
683 doi:10.1038/nature25510
- 684 Alexander, W. H., & Brown, J. W. (2015). Hierarchical error representation: a computational  
685 model of anterior cingulate and dorsolateral prefrontal cortex. *Neural Computation*,  
686 *27*(11), 2354-2410.
- 687 Behrens, T. E. J., Woolrich, M. W., Walton, M. E., & Rushworth, M. F. S. (2007). Learning the  
688 value of information in an uncertain world. *Nat Neurosci*, *10*(9), 1214-1221.  
689 doi:10.1038/nn1954
- 690 Blanchard, T. C., & Gershman, S. J. (2018). Pure correlates of exploration and exploitation in the  
691 human brain. *Cognitive, Affective, & Behavioral Neuroscience*, *18*(1), 117-126.  
692 doi:10.3758/s13415-017-0556-2
- 693 Brass, M., & Cramon, D. Y. v. (2004). Decomposing components of task preparation with  
694 functional magnetic resonance imaging. *Journal of cognitive neuroscience*, *16*(4), 609-  
695 620.
- 696 Brody, C. D., & Hanks, T. D. (2016). Neural underpinnings of the evidence accumulator.  
697 *Current Opinion in Neurobiology*, *37*, 149-157. doi:10.1016/j.conb.2016.01.003
- 698 Chan, S. C. Y., Niv, Y., & Norman, K. A. (2016). A Probability Distribution over Latent Causes,  
699 in the Orbitofrontal Cortex. *The Journal of Neuroscience*, *36*(30), 7817-7828.  
700 doi:10.1523/jneurosci.0659-16.2016
- 701 Chang, C.-C., & Lin, C.-J. (2011). LIBSVM: a library for support vector machines. *ACM*  
702 *transactions on intelligent systems and technology*, *2*(3), 27.  
703 doi:10.1145/1961189.1961199
- 704 d'Acromont, M., & Bossaerts, P. (2016). Neural Mechanisms Behind Identification of  
705 Leptokurtic Noise and Adaptive Behavioral Response. *Cerebral Cortex*, *26*(4), 1818-  
706 1830. doi:10.1093/cercor/bhw013
- 707 Daw, N. D., O'Doherty, J. P., Dayan, P., Seymour, B., & Dolan, R. J. (2006). Cortical substrates  
708 for exploratory decisions in humans. *Nature*, *441*(7095), 876-879.  
709 doi:10.1038/nature04766
- 710 Derrfuss, J., Brass, M., Neumann, J., & von Cramon, D. Y. (2005). Involvement of the inferior  
711 frontal junction in cognitive control: Meta-analyses of switching and Stroop studies.  
712 *Human Brain Mapping*, *25*(1), 22-34. doi:10.1002/hbm.20127
- 713 Eklund, A., Nichols, T. E., & Knutsson, H. (2016). Cluster failure: Why fMRI inferences for  
714 spatial extent have inflated false-positive rates. *Proceedings of the National Academy of*  
715 *Sciences*, *113*(28), 7900-7905. doi:10.1073/pnas.1602413113
- 716 Fischer, Adrian G., & Ullsperger, M. (2013). Real and Fictive Outcomes Are Processed  
717 Differently but Converge on a Common Adaptive Mechanism. *Neuron*, *79*(6), 1243-  
718 1255. doi:10.1016/j.neuron.2013.07.006
- 719 FitzGerald, T. H. B., Moran, R. J., Friston, K. J., & Dolan, R. J. (2015). Precision and neuronal  
720 dynamics in the human posterior parietal cortex during evidence accumulation.  
721 *NeuroImage*, *107*, 219-228. doi:10.1016/j.neuroimage.2014.12.015
- 722 Furl, N., & Averbek, B. B. (2011). Parietal Cortex and Insula Relate to Evidence Seeking  
723 Relevant to Reward-Related Decisions. *The Journal of Neuroscience*, *31*(48), 17572-  
724 17582. doi:10.1523/jneurosci.4236-11.2011

- 725 Gläscher, J., Daw, N., Dayan, P., & O'Doherty, J. P. (2010). States versus Rewards: Dissociable  
726 Neural Prediction Error Signals Underlying Model-Based and Model-Free Reinforcement  
727 Learning. *Neuron*, 66(4), 585-595. doi:10.1016/j.neuron.2010.04.016
- 728 Glaze, C. M., Kable, J. W., & Gold, J. I. (2015). Normative evidence accumulation in  
729 unpredictable environments. *eLife*, 4, e08825. doi:10.7554/eLife.08825
- 730 Greve, D. N., & Fischl, B. (2009). Accurate and robust brain image alignment using boundary-  
731 based registration. *NeuroImage*, 48(1), 63-72. doi:10.1016/j.neuroimage.2009.06.060
- 732 Hampton, A. N., Bossaerts, P., & O'Doherty, J. P. (2006). The Role of the Ventromedial  
733 Prefrontal Cortex in Abstract State-Based Inference during Decision Making in Humans.  
734 *The Journal of Neuroscience*, 26(32), 8360-8367. doi:10.1523/jneurosci.1010-06.2006
- 735 Hampton, A. N., & O'Doherty, J. P. (2007). Decoding the neural substrates of reward-related  
736 decision making with functional MRI. *Proceedings of the National Academy of Sciences*,  
737 104(4), 1377-1382. doi:10.1073/pnas.0606297104
- 738 Hanks, T. D., Kopec, C. D., Brunton, B. W., Duan, C. A., Erlich, J. C., & Brody, C. D. (2015).  
739 Distinct relationships of parietal and prefrontal cortices to evidence accumulation.  
740 *Nature*, 520, 220. doi:10.1038/nature14066
- 741 Hayden, B. Y., Nair, A. C., McCoy, A. N., & Platt, M. L. (2008). Posterior Cingulate Cortex  
742 Mediates Outcome-Contingent Allocation of Behavior. *Neuron*, 60(1), 19-25.  
743 doi:10.1016/j.neuron.2008.09.012
- 744 Hunt, L. T., Malalasekera, W. M. N., de Berker, A. O., Miranda, B., Farmer, S. F., Behrens, T.  
745 E. J., & Kennerley, S. W. (2018). Triple dissociation of attention and decision  
746 computations across prefrontal cortex. *Nature Neuroscience*, 21(10), 1471-1481.  
747 doi:10.1038/s41593-018-0239-5
- 748 Hwang, E. J., Dahlen, J. E., Mukundan, M., & Komiyama, T. (2017). History-based action  
749 selection bias in posterior parietal cortex. *Nature Communications*, 8(1), 1242.  
750 doi:10.1038/s41467-017-01356-z
- 751 Jenkinson, M., Bannister, P., Brady, M., & Smith, S. (2002). Improved Optimization for the  
752 Robust and Accurate Linear Registration and Motion Correction of Brain Images.  
753 *NeuroImage*, 17(2), 825-841. doi:10.1006/nimg.2002.1132
- 754 Jenkinson, M., Beckmann, C. F., Behrens, T. E., Woolrich, M. W., & Smith, S. M. (2012). FSL.  
755 *NeuroImage*, 62(2), 782-790. doi:10.1016/j.neuroimage.2011.09.015
- 756 Karlsson, M. P., Tervo, D. G. R., & Karpova, A. Y. (2012). Network Resets in Medial Prefrontal  
757 Cortex Mark the Onset of Behavioral Uncertainty. *Science*, 338(6103), 135-139.  
758 doi:10.1126/science.1226518
- 759 Kolling, N., Behrens, T. E. J., Mars, R. B., & Rushworth, M. F. S. (2012). Neural Mechanisms of  
760 Foraging. *Science*, 336(6077), 95-98. doi:10.1126/science.1216930
- 761 Kolling, N., Wittmann, M. K., Behrens, T. E. J., Boorman, E. D., Mars, R. B., & Rushworth, M.  
762 F. S. (2016). Value, search, persistence and model updating in anterior cingulate cortex.  
763 *Nature Neuroscience*, 19, 1280. doi:10.1038/nn.4382
- 764 Kriegeskorte, N., Goebel, R., & Bandettini, P. (2006). Information-based functional brain  
765 mapping. *Proceedings of the National Academy of Sciences of the United States of*  
766 *America*, 103(10), 3863-3868. doi:10.1073/pnas.0600244103
- 767 Li, Y. S., Nassar, M. R., Kable, J. W., & Gold, J. I. (2019). Individual neurons in the cingulate  
768 cortex encode action monitoring, not selection, during adaptive decision-making. *The*  
769 *Journal of Neuroscience*, 0159-0119. doi:10.1523/jneurosci.0159-19.2019

- 770 McGuire, J. T., Nassar, M. R., Gold, J. I., & Kable, J. W. (2014). Functionally Dissociable  
771 Influences on Learning Rate in a Dynamic Environment. *Neuron*, *84*(4), 870-881.  
772 doi:10.1016/j.neuron.2014.10.013
- 773 Muller, T. H., Mars, R. B., Behrens, T. E., & O'Reilly, J. X. (2019). Control of entropy in neural  
774 models of environmental state. *eLife*, *8*, e39404. doi:10.7554/eLife.39404
- 775 Mumford, J. A., Turner, B. O., Ashby, F. G., & Poldrack, R. A. (2012). Deconvolving BOLD  
776 activation in event-related designs for multivoxel pattern classification analyses.  
777 *NeuroImage*, *59*(3), 2636-2643. doi:10.1016/j.neuroimage.2011.08.076
- 778 Nassar, M. R., Bruckner, R., & Frank, M. J. (2019). Statistical context dictates the relationship  
779 between feedback-related EEG signals and learning. *eLife*, *8*, e46975.  
780 doi:10.7554/eLife.46975
- 781 Nassar, M. R., McGuire, J. T., Ritz, H., & Kable, J. W. (2019). Dissociable Forms of  
782 Uncertainty-Driven Representational Change Across the Human Brain. *The Journal of*  
783 *Neuroscience*, *39*(9), 1688-1698. doi:10.1523/jneurosci.1713-18.2018
- 784 Nassar, M. R., Rumsey, K. M., Wilson, R. C., Parikh, K., Heasley, B., & Gold, J. I. (2012).  
785 Rational regulation of learning dynamics by pupil-linked arousal systems. *Nature*  
786 *Neuroscience*, *15*(7), 1040-1046. doi:10.1038/nn.3130
- 787 Nassar, M. R., Wilson, R. C., Heasley, B., & Gold, J. I. (2010). An approximately Bayesian delta-  
788 rule model explains the dynamics of belief updating in a changing environment. *The*  
789 *Journal of Neuroscience*, *30*(37), 12366-12378. doi:10.1523/JNEUROSCI.0822-10.2010
- 790 O'Reilly, J. X., Schüffelgen, U., Cuell, S. F., Behrens, T. E. J., Mars, R. B., & Rushworth, M. F.  
791 S. (2013). Dissociable effects of surprise and model update in parietal and anterior  
792 cingulate cortex. *Proceedings of the National Academy of Sciences*, *110*(38), E3660-  
793 E3669. doi:10.1073/pnas.1305373110
- 794 Payzan-LeNestour, E., Dunne, S., Bossaerts, P., & O'Doherty, John P. (2013). The Neural  
795 Representation of Unexpected Uncertainty during Value-Based Decision Making.  
796 *Neuron*, *79*(1), 191-201. doi:10.1016/j.neuron.2013.04.037
- 797 Purcell, B. A., & Kiani, R. (2016). Hierarchical decision processes that operate over distinct  
798 timescales underlie choice and changes in strategy. *Proceedings of the National Academy*  
799 *of Sciences*, *113*(31), E4531-E4540. doi:10.1073/pnas.1524685113
- 800 Schuck, N. W., Cai, M. B., Wilson, R. C., & Niv, Y. (2016). Human Orbitofrontal Cortex  
801 Represents a Cognitive Map of State Space. *Neuron*, *91*(6), 1402-1412.  
802 doi:10.1016/j.neuron.2016.08.019
- 803 Smith, S. M., Jenkinson, M., Woolrich, M. W., Beckmann, C. F., Behrens, T. E., Johansen-Berg,  
804 H., . . . Flitney, D. E. (2004). Advances in functional and structural MR image analysis  
805 and implementation as FSL. *NeuroImage*, *23* (S1), S208-S219.  
806 doi:10.1016/j.neuroimage.2004.07.051
- 807 Sutton, R. S., & Barto, A. G. (1998). *Reinforcement Learning*. Cambridge, MA: MIT Press.
- 808 Ullsperger, M., Danielmeier, C., & Jochem, G. (2014). Neurophysiology of Performance  
809 Monitoring and Adaptive Behavior. *Physiological Reviews*, *94*(1), 35-79.  
810 doi:10.1152/physrev.00041.2012
- 811 Wilson, R. C., Takahashi, Y. K., Schoenbaum, G., & Niv, Y. (2014). Orbitofrontal Cortex as a  
812 Cognitive Map of Task Space. *Neuron*, *81*(2), 267-279.  
813 doi:10.1016/j.neuron.2013.11.005

814

815

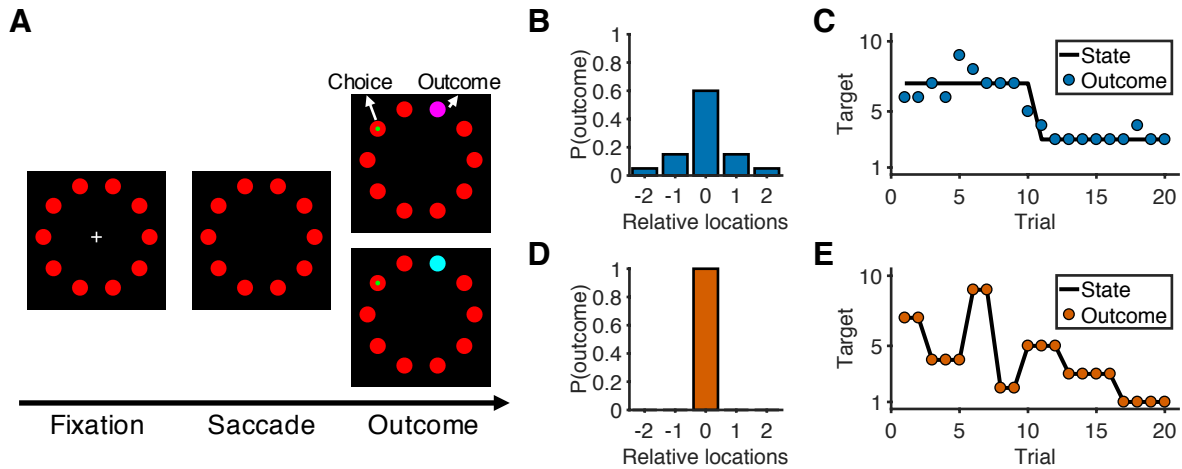

816  
817  
818  
819  
820  
821  
822  
823  
824  
825  
826  
827  
828  
829  
830  
831

### Figure 1

Overview of task and experimental design. (A) Sequence of the task. At the start of the trial, participants look at a cross in the center of the screen and maintain fixation for 0.5 sec to initialize the trial. After the cross disappears, participants choose one of 10 targets (red) by looking at it within 1.5 sec and then holding fixation on the chosen target for 0.3 sec. During the outcome phase (1 sec), a green dot inside the target indicates the participants' choice. The rewarded target is shown in purple or cyan to indicate the number of earnable points as 10 or 20, respectively. (B) Probability distribution of the rewarded target location in the noisy condition. Target location is relative to the location of the state (generative mean). The rewarded target probabilities for the relative locations of  $[-2, -1, 0, 1, 2]$  are  $[0.05, 0.15, 0.6, 0.15, 0.05]$ . (C) Example of trials in the noisy condition. The states change occasionally with a hazard rate of 0.02. (D) Probability distribution of the rewarded target location in the unstable condition. Because there is no noise in this condition, the rewarded target is always at the location of the state. (E) Example of trials in the unstable condition. The states change frequently with a hazard rate of 0.35.

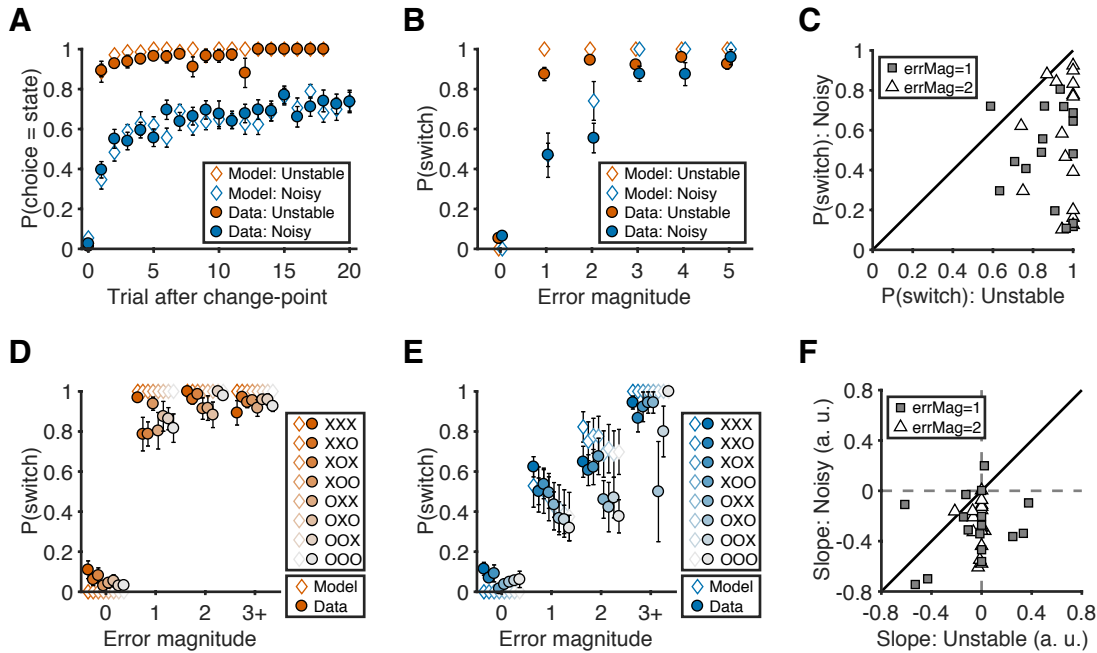

832  
833  
834  
835  
836  
837  
838  
839  
840  
841  
842  
843  
844  
845  
846  
847  
848

## Figure 2

Behavioral results. (A) Probability of choosing the best target after change-points. Symbols and error bars are mean±SEM across subjects (solid symbols) or simulations (open symbols). (B) Relationship between error magnitude and switch probability. Symbols and error bars are as in A. (C) The distribution of switch probabilities for small errors (magnitude of 1 or 2) in both conditions. Each data point represents one participant. Distributions for all error magnitudes are shown in Figure 2 – Figure Supplement 1. (D) Probability of switch as a function of current error magnitude and error history in the unstable condition. Different colors represent different error histories for the past 3 trials. A correct trial is marked as O, and an error trial is marked as X. For example, XOO implies that trial t-1 was an error trial, and trial t-2 and trial t-3 were correct trials. Symbols and error bars are mean±SEM across subjects. (E) Probability of switch as a function of current error magnitude and error history in the noisy condition. Symbols and error bars are as in D. (F) The distribution of the slopes of switch probability against error history for small errors (magnitude of 1 or 2) in both conditions. Each data point represents one participant. Distributions for all error magnitudes are shown in Figure 2 – Figure Supplement 1.

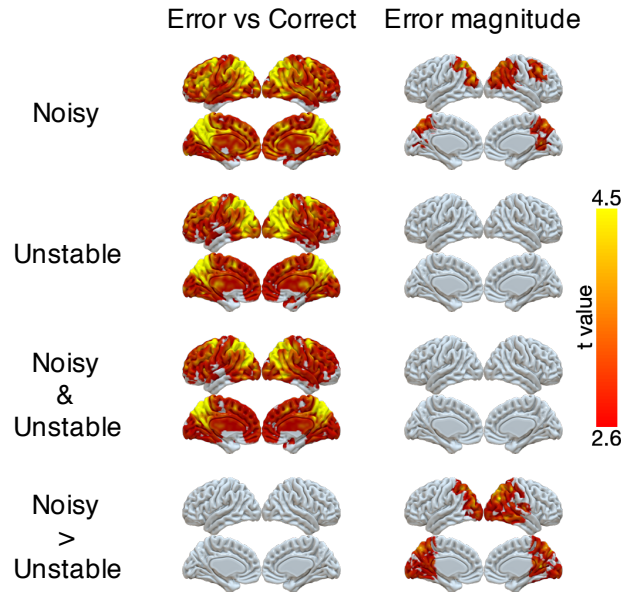

849  
850

851

**Figure 3**

852 Representations of error and error magnitude. For error versus correct analyses, multi-voxel neural  
853 patterns were used to classify whether the response on the current trial was correct or an error. For error  
854 magnitude analyses, multi-voxel neural patterns were used to classify different error magnitudes (1, 2, 3+)  
855 conditional on the current trial being an error. Accuracies were calculated and compared with the baseline  
856 accuracy within each subject and then tested at the group level. The representation of current error  
857 magnitude is stronger in parietal cortex in the noisy condition than the unstable condition. The cluster-  
858 forming threshold was an uncorrected voxel  $p < 0.01$  ( $t = 2.6$ ), with cluster extent corrected for multiple  
859 comparisons using non-parametric permutation tests.

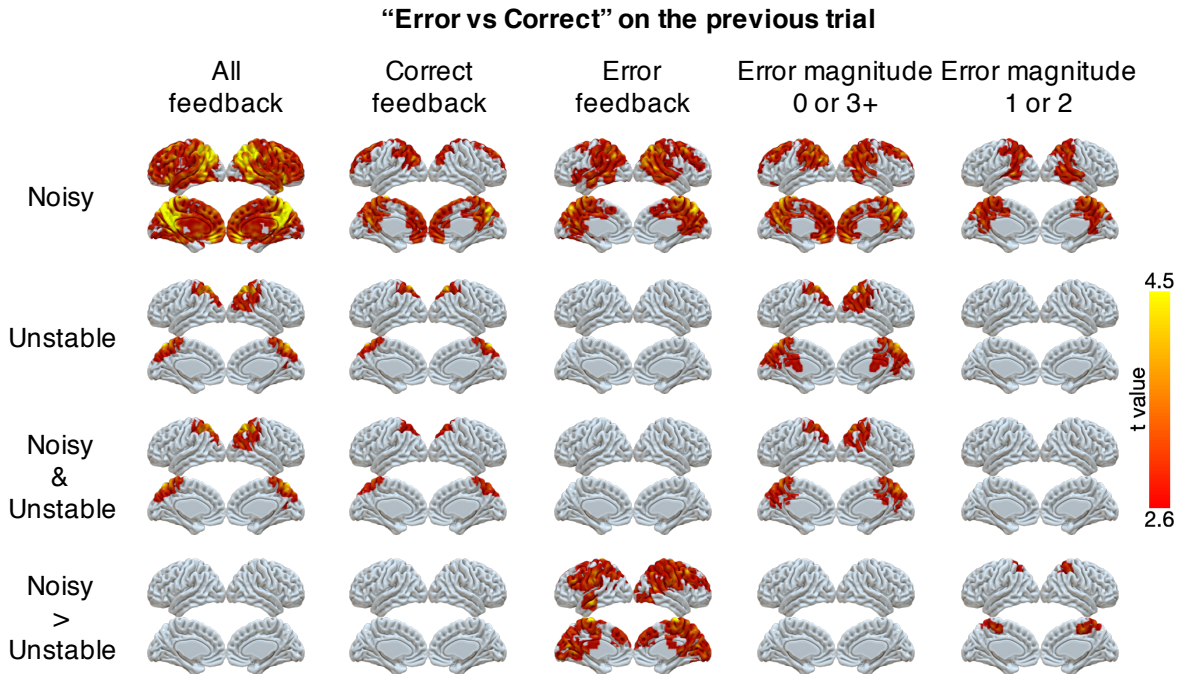

860  
861  
862  
863  
864  
865  
866  
867  
868  
869  
870

**Figure 4**

Representations of errors on the previous trial conditional on different types of current trials (columns). Multi-voxel neural patterns were used to classify correct responses versus errors on the previous trial. This analysis was repeated for different types of current trials: all feedback, correct feedback, error feedback, error magnitude of 0 or 3+, and error magnitude of 1 or 2. The representation of past errors is stronger in parietal cortex in the noisy condition than the unstable condition when the current trial is an error or the current error magnitude is 1 or 2. The cluster-forming threshold was an uncorrected voxel  $p < 0.01$  ( $t = 2.6$ ), with cluster extent corrected for multiple comparisons using non-parametric permutation tests.



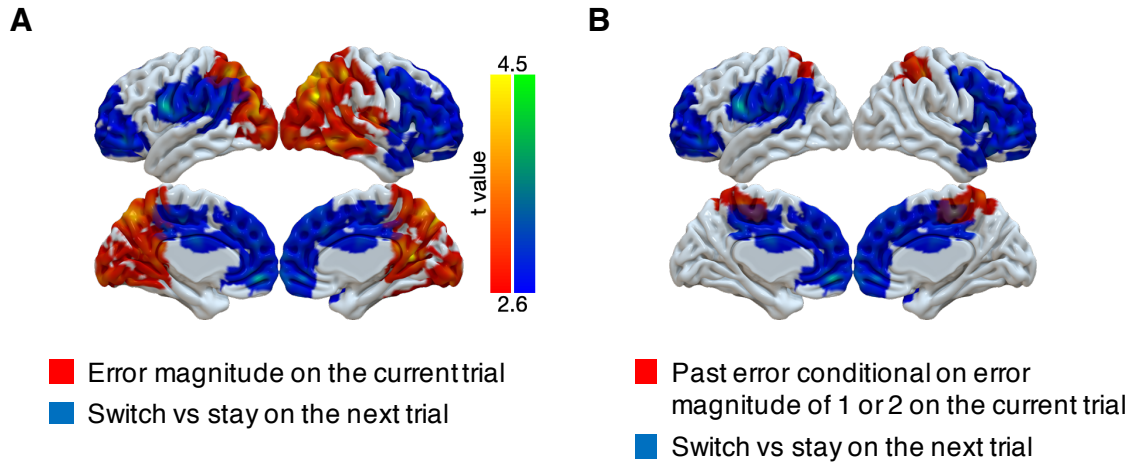

871  
872  
873  
874  
875  
876  
877  
878  
879  
880  
881  
882  
883

**Figure 5**

Representations of subsequent behavioral choices (switch versus stay) after ambiguous small errors in the noisy condition. **(A)** Overlap of results for switch versus stay on the next trial and error magnitude on the current trial. Multi-voxel neural patterns were used to classify whether participants switch their choice to another target or stay on the same target on the next trial. We focused on the most ambiguous errors (error magnitude of 1 or 2 in the noisy condition). Above-chance classification performance was found in a large cluster encompassing the frontal lobe. The cluster-forming threshold was an uncorrected voxel  $p < 0.01$  ( $t = 2.6$ ), with cluster extent corrected for multiple comparisons using non-parametric permutation tests. **(B)** Overlap of results for switch versus stay on the next trial and past error conditional on error magnitude of 1 or 2 on the current trial.

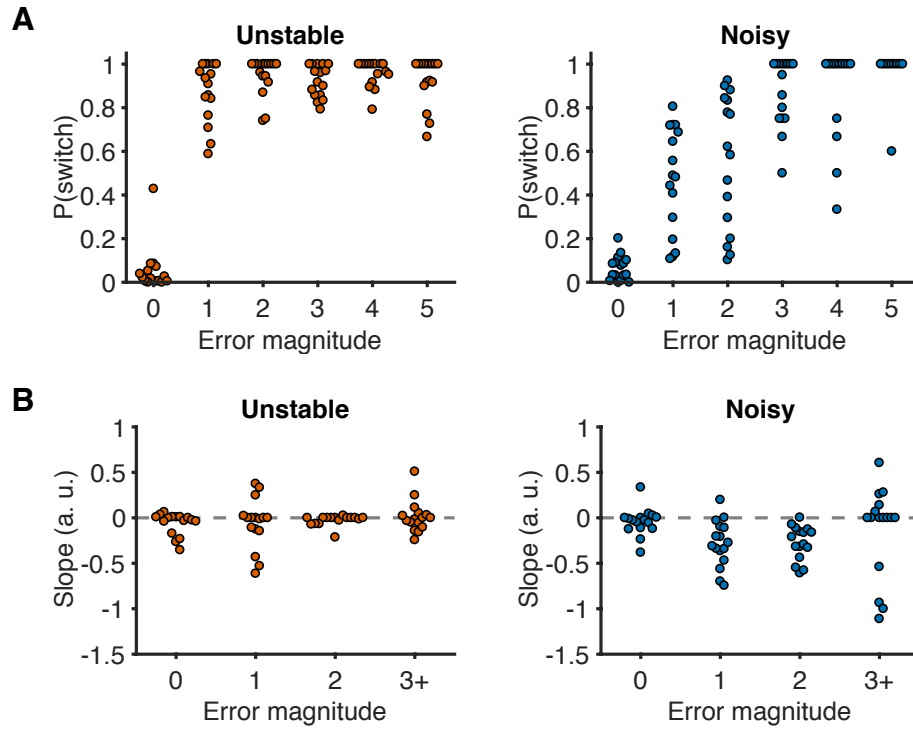

884  
885  
886  
887  
888  
889  
890  
891

**Figure 2 - Figure supplement 1**

Distributions of behavior as a function of error magnitude. (A) Distributions of switch probability as a function of error magnitude. Each data point represents one participant. (B) Distributions of slopes of switch probability against error history as a function of error magnitude. Each data point represents one participant.

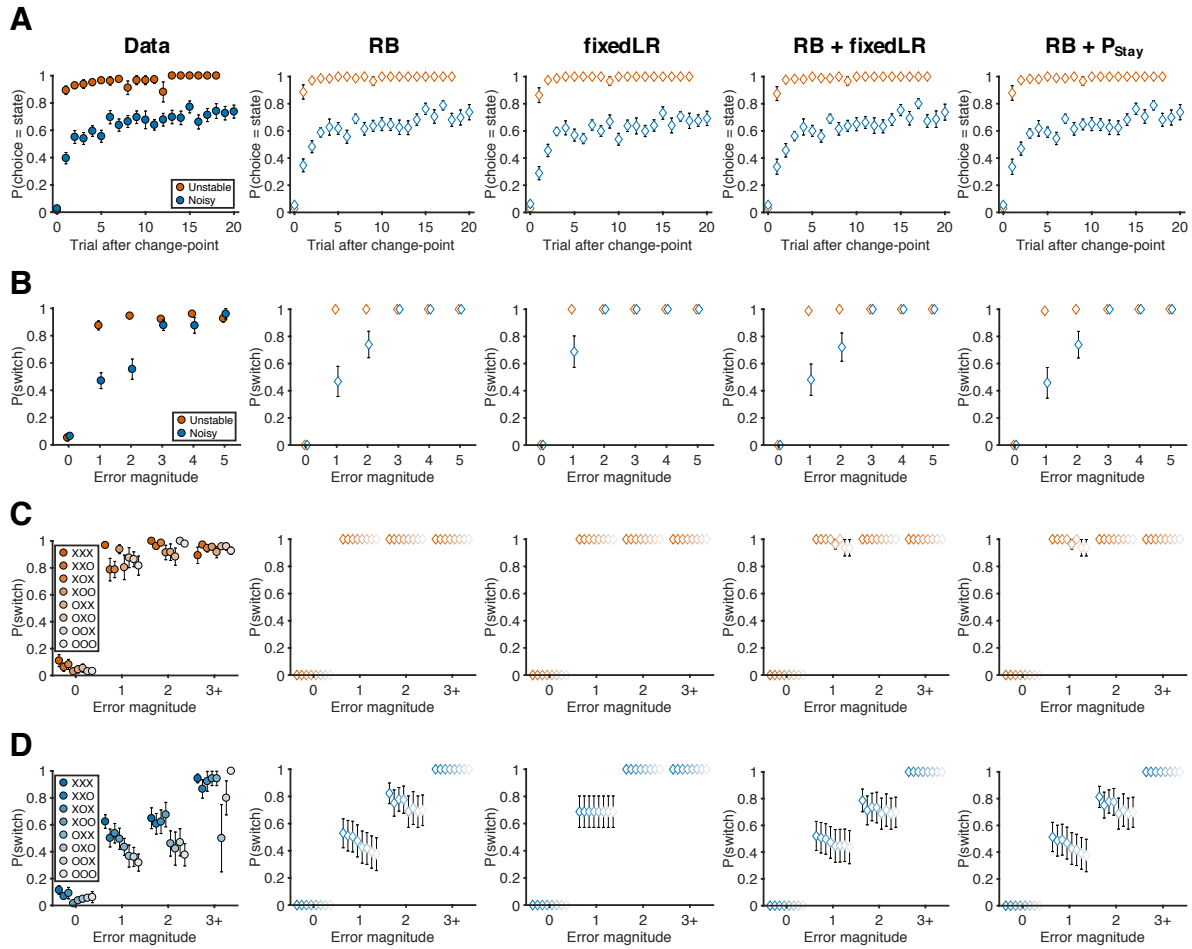

892  
893  
894  
895  
896  
897  
898  
899  
900

### Figure 2 - Figure supplement 2

Behavioral data and predictions from different models. (A) Probability of choosing the best target after change-points. (RB: reduced Bayesian; fixedLR: fixed learning rate; P<sub>stay</sub>: fixed tendency to stay) (B) The relationship between error magnitude and switch probability. (C) Probability of switch as a function of current error magnitude and error history in the unstable condition. (D) Probability of switch as a function of current error magnitude and error history in the noisy condition. Symbols and colors are as in Figure 2.

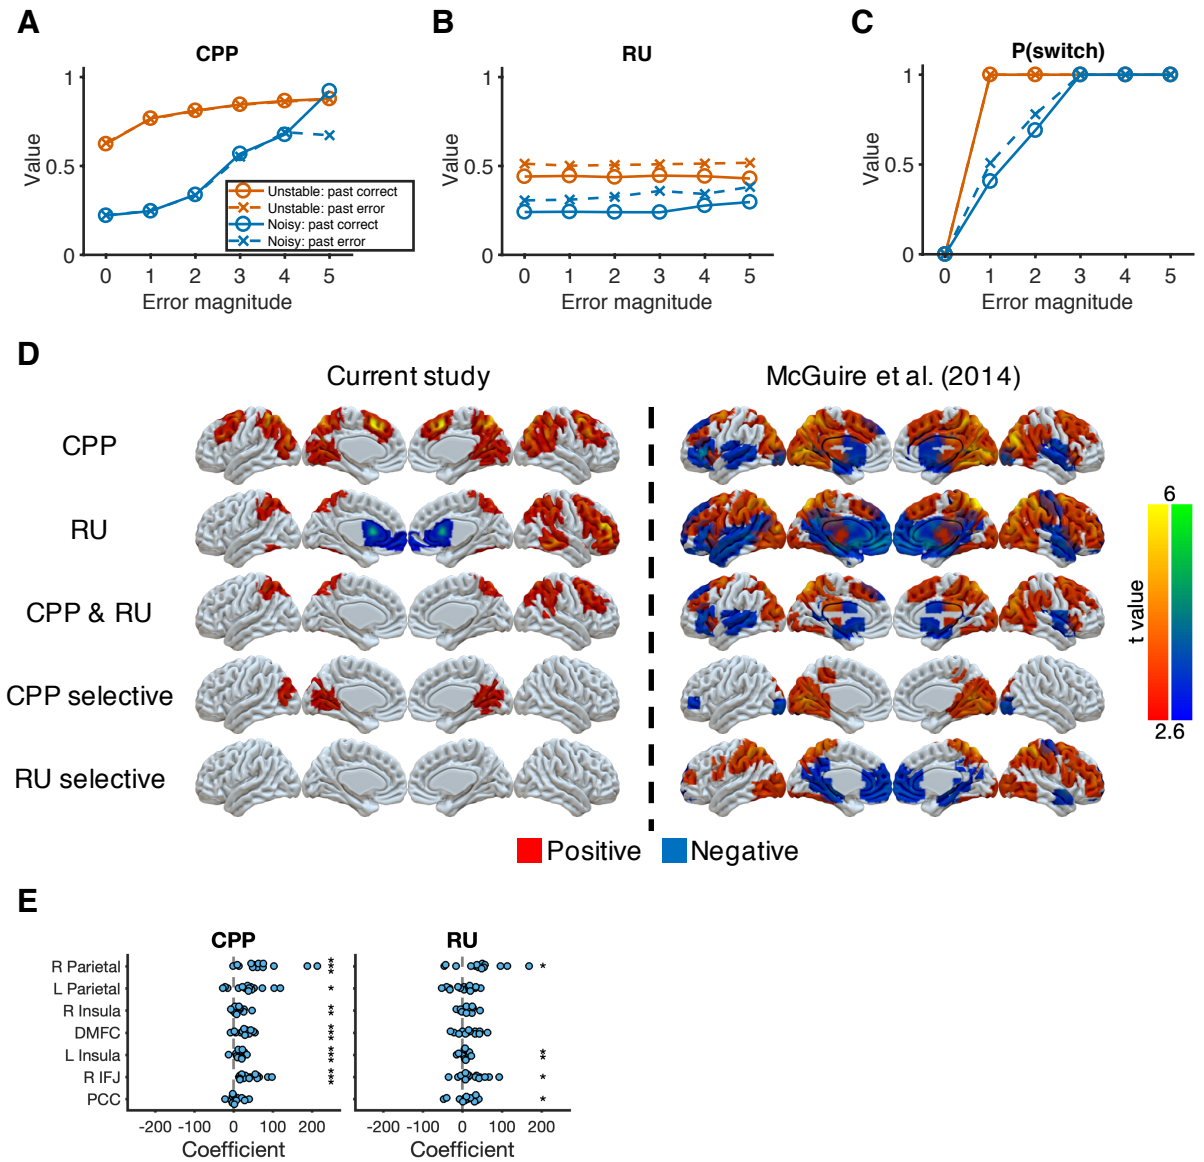

901  
902  
903  
904  
905  
906  
907  
908  
909  
910  
911  
912  
913  
914  
915  
916  
917

**Figure 2 - Figure supplement 3**

Reduced Bayesian model applied to behavioral and imaging data. (A) Model prediction for CPP. We calculated CPP from the fitted reduced Bayesian model, which incorporates subjective estimates of hazard rate and noise for each condition. The value of CPP increases as the current error magnitude increases in both conditions, but with a stronger dependence on the outcome of the previous trial in the noisy condition. (B) Model prediction for RU. We calculated RU from the fitted reduced Bayesian model, which incorporates subjective estimates of hazard rate and noise for each condition. The value of RU is minimally affected by the current error magnitude. Instead, a past error tends to increase RU. (C) Model prediction for probability of switching choices. Increasing CPP causes the probability of switching to increase more steeply as the current error magnitude increases in the unstable condition versus in the noisy condition. For small errors (error magnitude of 1 and 2) in the noisy condition, the probability of switching is further influence by RU, which is affected by past errors. (D) Neural representation of CPP and RU. CPP selective effect represents the conjunction of CPP>0 and CPP>RU. RU selective effect represents the conjunction of RU>0 and RU>CPP. The results were thresholded based on uncorrected voxel  $p<0.01$  ( $t=2.6$ ). (E) ROI analysis for CPP and RU. These ROIs were selected based on the common

918 regions of CPP, RU, and reward effects in McGuire et al. (2014). Significance was tested by a sign test.  
919 \* $p < 0.05$ , \*\* $p < 0.01$ , \*\*\* $p < 0.001$ .  
920

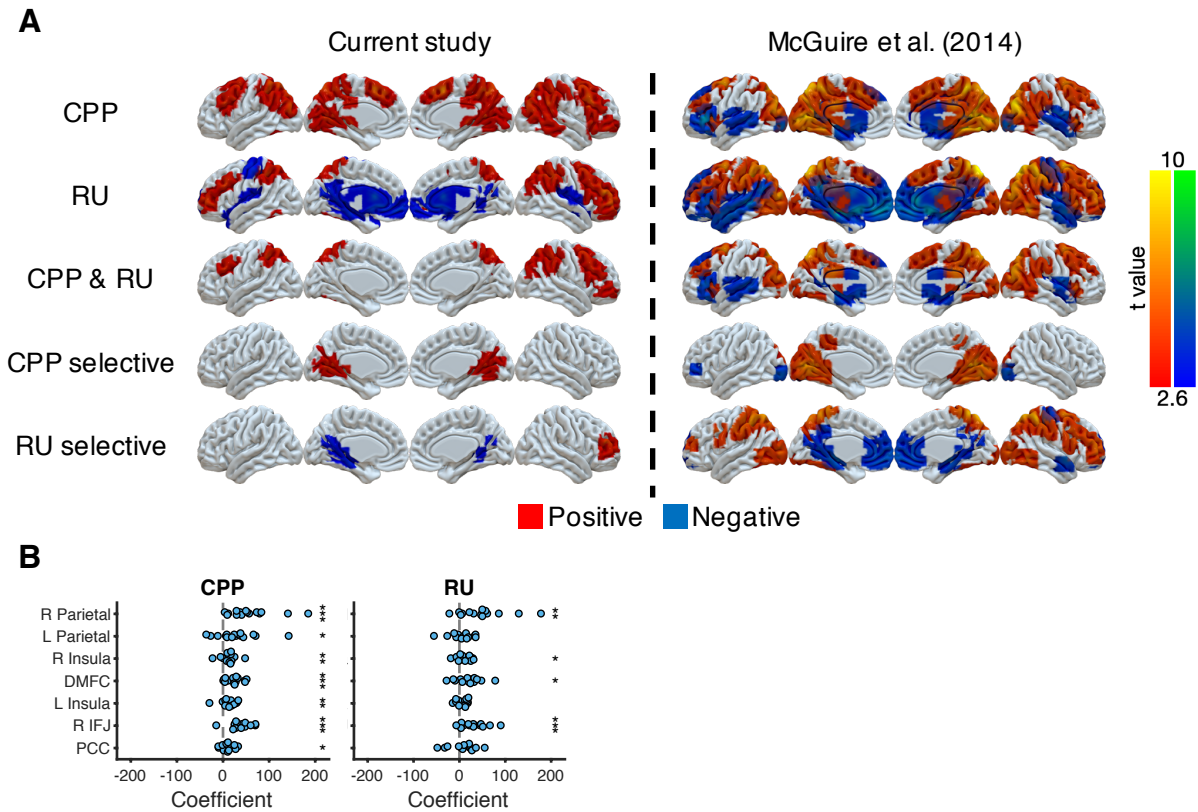

921  
922  
923  
924  
925  
926  
927  
928  
929  
930  
931  
932  
933

**Figure 2 - Figure supplement 4**

Neural representations of CPP and RU from the approximately ideal observer, which is the reduced Bayesian model with true hazard rate and noise, for direct comparison to analyses in McGuire et al. (2014), which used covariates constructed from the ideal rather than the fitted model. (A) Neural representation of CPP and RU in the current study and in McGuire et al. (2014). CPP selective effect represents the conjunction of CPP>0 and CPP>RU. RU selective effect represents the conjunction of RU>0 and RU>CPP. The results were thresholded based on uncorrected voxel  $p<0.01$  ( $t=2.6$ ). (B) ROI analysis for CPP and RU. These ROIs were selected based on the common regions of CPP, RU and reward effects in McGuire et al. (2014). Significance was tested by a sign test. \* $p<0.05$ , \*\* $p<0.01$ , \*\*\* $p<0.001$ .

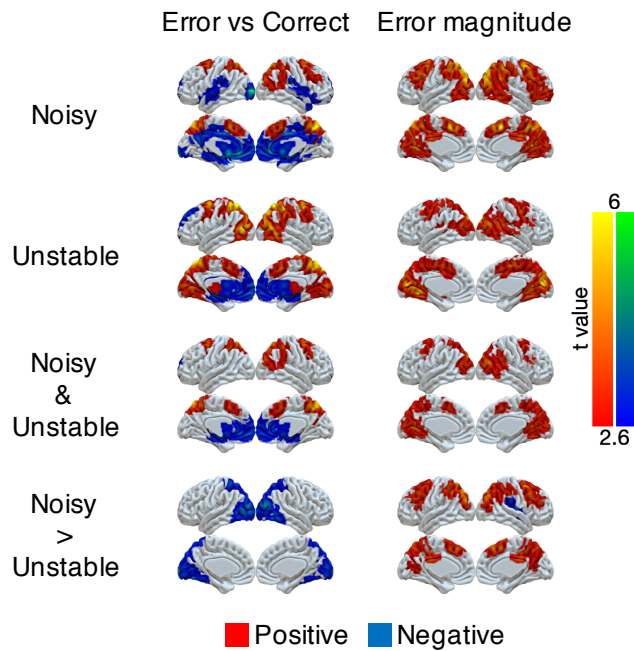

935

936

937 **Figure 3 - Figure supplement 1**

938 Univariate representations of error and error magnitude. A GLM was implemented on the preprocessed  
 939 fMRI data (smoothed with 6 mm FWHM Gaussian kernel). The trial-by-trial regressors of interest that  
 940 were included in the GLM were: onset of correct trials, earnable value on correct trials, onset of error  
 941 trials, error magnitude on error trials, switch or stay on error trials and earnable value on error trials. We  
 942 focused on the effects of error (which is the difference between the onset of error trials and the onset of  
 943 correct trials) and error magnitude. Group  $t$ -values are shown. For statistical testing, we implemented one-  
 944 sample cluster-mass permutation tests with 5,000 iterations. The cluster-forming threshold was  
 945 uncorrected voxel  $p < 0.01$  ( $t = 2.6$ ).  
 946

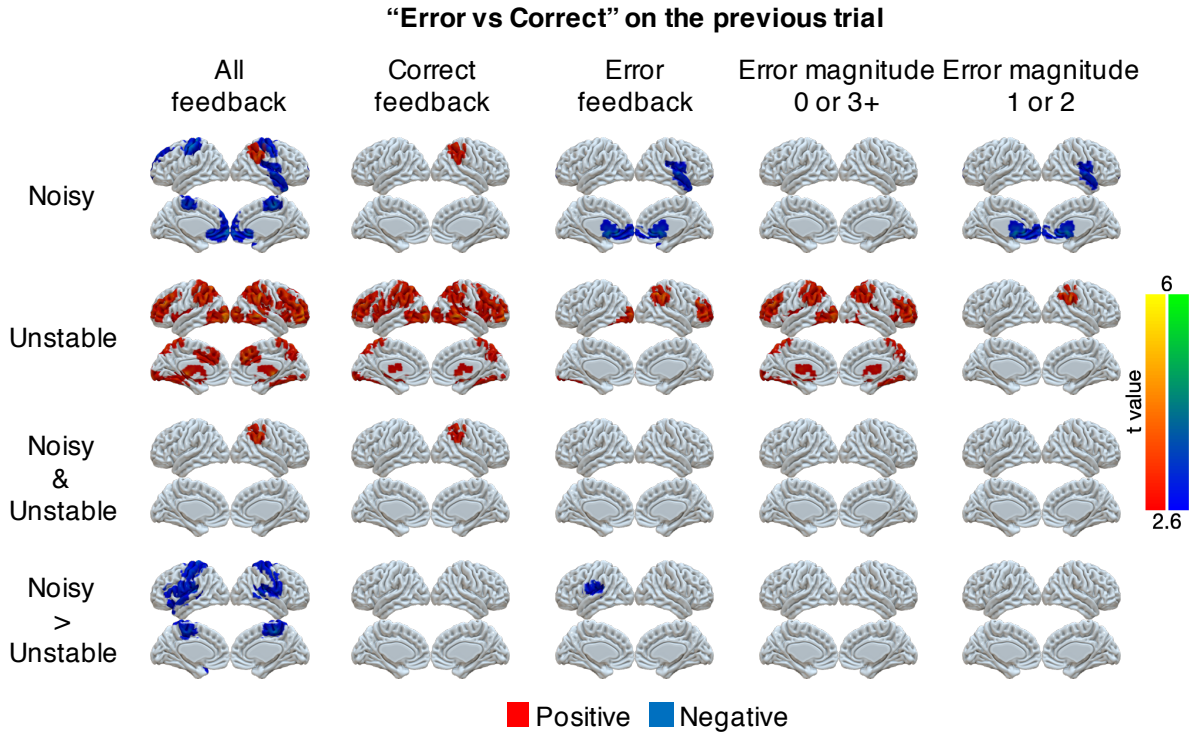

947  
948  
949  
950  
951  
952  
953  
954  
955  
956  
957  
958  
959  
960  
961  
962  
963  
964  
965  
966  
967  
968

**Figure 4 - Figure supplement 1**

Univariate representations of error on the previous trial conditional on different types of current trials (columns). Several GLMs were implemented on the preprocessed fMRI data (smoothed with 6 mm FWHM Gaussian kernel). First, we examined errors on the previous trial across all trials. The trial-by-trial regressors of interest that were included in the GLM were: onset of trials, error on trial  $t$ , error on trial  $t-1$ , error on trial  $t-2$ , and error on trial  $t-3$ . We focused on the effect of error on trial  $t-1$ . Second, we separated the analysis of past errors conditional on the current trial being correct or an error. The trial-by-trial regressors of interest that were included in the GLM were: onset of current correct trials, errors on trial  $t-1$ ,  $t-2$ , or  $t-3$  conditional on the current trial being correct, onset of current error trials, errors on trial  $t-1$ ,  $t-2$ , or  $t-3$  conditional on the current trial being an error. We focused on the effects of error on trial  $t-1$  conditional on the current trial being correct or an error. Third, we separated errors conditional on error magnitudes of 0 or 3+ or error magnitudes of 1 or 2. The trial-by-trial regressors of interest that were included in the GLM were: onset of current trials with error magnitudes of 0 or 3+, errors on trial  $t-1$ ,  $t-2$  or  $t-3$  conditional on the current trial error magnitude of 0 or 3+, onset of current trials with error magnitudes of 1 or 2, errors on trial  $t-1$ ,  $t-2$  or  $t-3$  conditional on the current trial error magnitude of 1 or 2. We focused on the effects of errors on trial  $t-1$  conditional on the current trials error magnitude of 0 or 3+ or error magnitude of 1 or 2. Group  $t$ -values are shown. For statistical testing, we implemented one-sample cluster-mass permutation tests with 5,000 iterations. The cluster-forming threshold was uncorrected voxel  $p < 0.01$  ( $t = 2.6$ ).



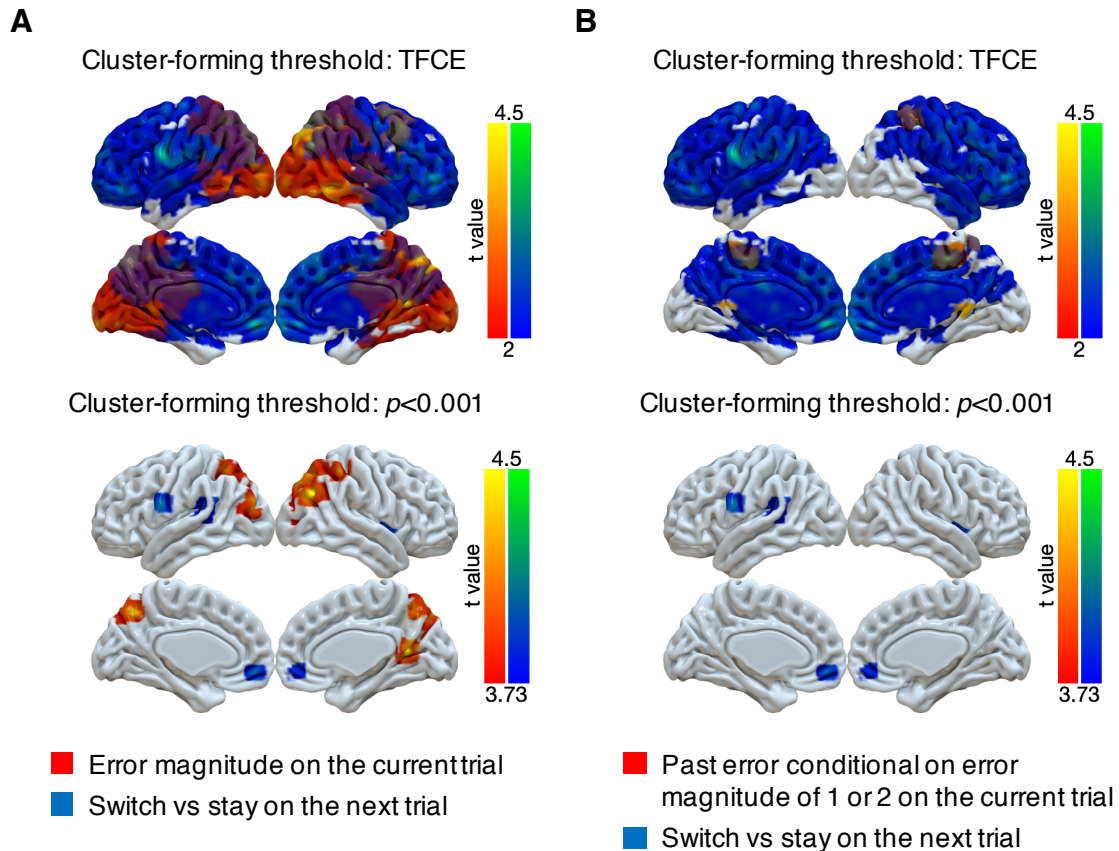

969  
 970  
 971  
 972  
 973  
 974  
 975  
 976  
 977  
 978  
 979  
 980  
 981  
 982  
 983  
 984  
 985  
 986

**Figure 5 - Figure supplement 1**

Representations of subsequent behavioral choices (switch versus stay) thresholded via threshold-free cluster enhancement (TFCE) or with a cluster-forming threshold of  $p < 0.001$ . (A) Overlap of results for switch versus stay on the next trial and error magnitude on the current trial. We implemented two types of cluster-forming approaches: TFCE and uncorrected voxel  $p < 0.001$ . First, significance testing was implemented through permutation tests with threshold-free cluster enhancement (FSL's randomize), which does not require a pre-defined cluster-forming threshold. The result of switch versus stay showed little spatial specificity. For the purpose of display, the results were thresholded based on uncorrected voxel  $p < 0.03$  ( $t=2$ ). Second, we used a cluster-forming threshold of uncorrected voxel  $p < 0.001$  ( $t=3.73$ ) and tested the significance of the formed cluster via one-sample cluster-mass permutation tests with 5,000 iterations. The results showed high spatial specificity and several previously identified regions were still significant: middle cingulate cortex [14, -8, 30], right insula [38, 4, 2], medial OFC [-4, 50, -10], left premotor cortex [-62, 2, 24] and left superior temporal gyrus [-50, -32, 12]. (B) Overlap of results for switch versus stay on the next trial and past error conditional on error magnitude of 1 or 2 on the current trial. The two types of cluster-forming approaches are shown.

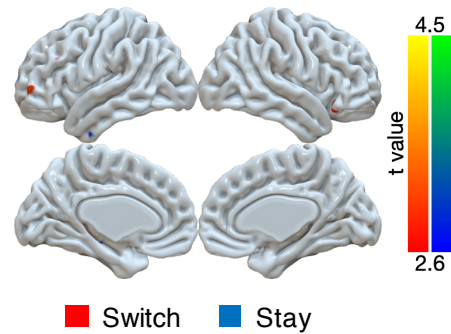

987  
 988  
 989  
 990  
 991  
 992  
 993  
 994  
 995  
 996  
 997

**Figure 5 - Figure supplement 2**

Univariate GLM for switch versus stay on small error trials (magnitudes of 1 or 2) in the noisy condition. A GLM was implemented with several trial-by-trial regressors of interest: onset of trials with error magnitude of 0, onset of trials with error magnitude of 3+, onset of trials with error magnitudes of 1 or 2 followed by switching, onset of trials with error magnitudes of 1 or 2 followed by staying. We tested the effects of the difference between switch and stay for small errors. For statistical testing, we implemented one-sample cluster-mass permutation tests with 5,000 iterations. The cluster-forming threshold was uncorrected voxel  $p < 0.01$  ( $t = 2.6$ ). There were no significant clusters. For the demonstration, the results were shown with uncorrected voxel  $p < 0.01$ .

998 Table 1  
 999 BIC of behavior models

| Model                               | Condition | BIC improvement by RB model        |
|-------------------------------------|-----------|------------------------------------|
| Reduced Bayesian model (RB)         | Unstable  |                                    |
|                                     | Noisy     |                                    |
| Fixed learning rate model (fixedLR) | Unstable  | 5.06 [3.63, 5.71]**                |
|                                     | Noisy     | -21.05 [-76.63, 0.20] <sup>†</sup> |
| RB + fixedLR                        | Unstable  | -9.83 [-11.20, -8.07]***           |
|                                     | Noisy     | -4.64 [-10.51, 0.89]               |
| RB + P <sub>stay</sub>              | Unstable  | -5.20 [-5.65, -3.68]**             |
|                                     | Noisy     | -5.55 [-5.65, -2.67]*              |

1000 Values are shown as median [IQR]. A negative value means that the RB model performed better  
 1001 than the alternative model. Significance was tested by a sign test. <sup>†</sup> $p < 0.08$ , \*\* $p < 0.01$ ,  
 1002 \*\*\* $p < 0.001$ .  
 1003

1004 Table 2

1005 Parameters of behavior models

| Model                  | Parameter         | Unstable            | Noisy             | Unstable > Noisy     |
|------------------------|-------------------|---------------------|-------------------|----------------------|
| RB                     | H                 | 0.82 [0.64, 0.90]   | 0.33 [0.11, 0.50] | 0.37 [0.24, 0.62]*** |
|                        | K                 | 0.59 [0.03, 2.22]   | 1.86 [1.22, 2.32] | -0.23 [-1.97, 0.71]  |
| fixedLR                | $\alpha_{fixed}$  | 0.96 [0.86, 0.97]   | 0.63 [0.37, 0.73] | 0.33 [0.19, 0.49]*** |
| RB + fixedLR           | H                 | 0.07 [0.00, 0.86]   | 0.03 [0.00, 0.19] | 0.03 [-0.03, 0.77]   |
|                        | K                 | 11.19 [2.78, 18.01] | 3.22 [2.28, 9.90] | 5.13 [-4.91, 16.10]  |
|                        | $\alpha_{fixed}$  | 0.96 [0.75, 1.00]   | 0.88 [0.23, 1.00] | 0.02 [-0.12, 0.52]   |
|                        | w                 | 0.38 [0.16, 0.81]   | 0.71 [0.52, 0.87] | -0.28 [-0.57, 0.22]  |
| RB + P <sub>stay</sub> | H                 | 0.73 [0.64, 0.88]   | 0.31 [0.06, 0.53] | 0.27 [0.15, 0.66]**  |
|                        | K                 | 8.42 [0.73, 30.42]  | 2.19 [1.62, 9.09] | 2.71 [-2.60, 23.94]  |
|                        | P <sub>stay</sub> | 0.01 [0.00, 0.05]   | 0.01 [0.00, 0.13] | 0.00 [-0.11, 0.03]   |

1006 Parameter values are shown as median [IQR]. Difference of parameter values between the two  
 1007 conditions was tested by a sign test. \*\* $p < 0.01$ , \*\*\* $p < 0.001$ .

1008

1009 Table 3

1010 Summary of fMRI results: error magnitude and past error

| Cluster index                                                                  | #Voxels | Region                     | Peak <i>t</i> | Peak <i>x</i> | Peak <i>y</i> | Peak <i>z</i> |
|--------------------------------------------------------------------------------|---------|----------------------------|---------------|---------------|---------------|---------------|
| Error magnitude: noisy versus unstable                                         |         |                            |               |               |               |               |
| 1                                                                              | 21032   | R Precuneus                | 5.22          | 16            | -56           | 12            |
|                                                                                |         | R Angular gyrus            | 5.17          | 44            | -70           | 32            |
|                                                                                |         | L Precuneus                | 5.08          | -18           | -58           | 20            |
|                                                                                |         | Occipital pole             | 5.07          | 2             | -98           | -2            |
|                                                                                |         | L Superior parietal lobule | 4.91          | -10           | -66           | 48            |
|                                                                                |         | R Occipital cortex         | 4.69          | 26            | -76           | 18            |
|                                                                                |         | L Occipital cortex         | 4.54          | -38           | -86           | 26            |
|                                                                                |         | R Superior parietal lobule | 4.44          | 44            | -44           | 54            |
|                                                                                |         | Posterior cingulate cortex | 4.43          | 2             | -46           | 20            |
| Past error on current error magnitude of 1 or 2: noisy versus unstable         |         |                            |               |               |               |               |
| 1                                                                              | 1881    | Posterior cingulate cortex | 4.79          | 12            | -24           | 52            |
|                                                                                |         | R Superior parietal lobule | 4.04          | 32            | -38           | 54            |
|                                                                                |         | R Precuneus                | 3.58          | 6             | -54           | 70            |
|                                                                                |         | L Superior parietal lobule | 3.54          | -16           | -54           | 62            |
| Conjunction: Error magnitude & Past error on current error magnitude of 1 or 2 |         |                            |               |               |               |               |
| 1                                                                              | 304     | R Superior parietal lobule | 3.41          | 38            | -40           | 52            |
| 2                                                                              | 103     | R Precuneus                | 3.02          | 2             | -58           | 70            |
| 3                                                                              | 81      | L Superior parietal lobule | 3.23          | -18           | -56           | 72            |

1011

1012 Table 4

1013 Summary of fMRI results: behavior change

| Cluster index                                                          | #Voxels | Region                      | Peak <i>t</i> | Peak <i>x</i> | Peak <i>y</i> | Peak <i>z</i> |
|------------------------------------------------------------------------|---------|-----------------------------|---------------|---------------|---------------|---------------|
| Switch versus stay on error magnitude of 1 or 2 in the noisy condition |         |                             |               |               |               |               |
| 1                                                                      | 12042   | Middle cingulate cortex     | 4.35          | 14            | -8            | 30            |
|                                                                        |         | R Insula                    | 4.33          | 38            | 4             | 2             |
|                                                                        |         | Medial orbitofrontal cortex | 4.24          | -4            | 50            | -10           |
|                                                                        |         | R Frontal pole              | 4.11          | 40            | 46            | 0             |
|                                                                        |         | R Inferior frontal gyrus    | 4.11          | 48            | 26            | 10            |
|                                                                        |         | L Frontal pole              | 4.01          | -24           | 52            | -2            |
|                                                                        |         | Dorsomedial frontal cortex  | 3.96          | 0             | 26            | 34            |
|                                                                        |         | Posterior cingulate cortex  | 3.93          | 2             | -28           | 50            |
|                                                                        |         | R Primary motor cortex      | 3.91          | 48            | -6            | 50            |
|                                                                        |         | Anterior cingulate cortex   | 3.51          | 0             | 48            | 20            |
| 2                                                                      | 3134    | L Premotor cortex           | 4.43          | -62           | 2             | 24            |
|                                                                        |         | L Superior temporal gyrus   | 4.28          | -50           | -32           | 12            |
|                                                                        |         | L Inferior frontal junction | 3.72          | -38           | 4             | 28            |
|                                                                        |         | L Postcentral gyrus         | 3.61          | -50           | -26           | 44            |

1014
